# Supplementary material
Source: PubMed Central journal article supplement (PMC4342272)
Supplement: NIHMS665993-supplement-Supporting_information_and_data.pdf [file NIHMS665993-supplement-Supporting_information_and_data.pdf]

## Supporting information for

### KINATEST-ID™ : A PIPELINE TO DEVELOP PHOSPHORYLATION-DEPENDENT TERBIUM SENSITIZING KINASE ASSAYS

Andrew M. Lipchik<sup>1</sup>, Minervo Perez, Scott Bolton, Vasin Dumrongprechachan, Steven B. Ouellette<sup>2</sup>,  
Wei Cui, Laurie L. Parker<sup>3\*</sup>

Department of Medicinal Chemistry and Molecular Pharmacology, College of Pharmacy, Center for  
Cancer Research, Purdue University, West Lafayette, IN 47907

Present addresses: <sup>1</sup>Department of Genetics, Stanford University School of Medicine, Stanford, CA,  
94305; <sup>2</sup>KinaSense LLC, West Lafayette, IN 47906; <sup>3</sup>Department of Biochemistry, Molecular Biology  
and Biophysics, College of Biological Sciences, University of Minnesota Twin Cities, Minneapolis, MN  
55455

\*Corresponding author: [llparker@umn.edu](mailto:llparker@umn.edu)

## Methods

**Binding Affinity.** Tb<sup>3+</sup> binding to the phosphorylated and unphosphorylated forms of the various biosensors was measured using Tb<sup>3+</sup> luminescence sensitized by the central tyrosine or phosphotyrosine residue of phosphorylated or unphosphorylated biosensors respectively. Tb<sup>3+</sup> was added to 100 nM of the biosensors in either form at final concentrations ranging from 0 to 300 μM. All experiments were carried out in 10 mM HEPES and 100 mM NaCl (pH 7.5) at a volume of 100 μL. Luminescent emission spectra were collected between from 450 and 650 nm for 1 ms following a 50 μs delay and 30 readings per data point after excitation of the samples at 266 nm (phosphorylated biosensors) or 275 nm (unphosphorylated biosensors). Background luminescence emission was subtracted from the peptides in the absence of terbium. The area under each spectrum was integrated and used as the metric for quantification. The binding constant, K<sub>d</sub>, was determined by fitting the data to equation [S1] using GraphPad Prism, where B<sub>max</sub> is the maximum terbium luminescence based on the area under the emission spectra and X is the concentration of terbium.

$$Y = B_{\max} * X / (K_d + X) \quad [S1]$$

**Luminescence Lifetime.** Luminescence emission spectra were collected on a Biotek Synergy4 plate reader at 23°C in black 384-well plates (Greiner Fluortrac 200). Spectra were collected from 450-650 nm after excitation at 266 nm with a delay time starting at 100 μsec, increasing in steps of 100 μsec to 5000 μsec, and a collection time of 1 ms. Samples were prepared with 1 μM phosphorylated or unphosphorylated biosensor with 1 μM Tb<sup>3+</sup> in 100 mM NaCl, 10 mM HEPES pH 7.5 in H<sub>2</sub>O or D<sub>2</sub>O in 100 μL total volume. The intensity of the emission peak at 549 nm was used as the metric for luminescence lifetime. Data were fitted to a single exponential decay curve using GraphPad Prism and lifetimes were determined. The luminescent decay rate of pKAStide:Tb<sup>3+</sup> and KAStide:Tb<sup>3+</sup> in H<sub>2</sub>O and D<sub>2</sub>O were determined and applied to the following equation [S2] to determine the hydration number (q):

$$q = A'(k_{\text{H}_2\text{O}} - k_{\text{D}_2\text{O}} - 0.06) \quad [S2]$$

where k<sub>H<sub>2</sub>O</sub> is the luminescence decay constant in H<sub>2</sub>O and k<sub>D<sub>2</sub>O</sub> is the luminescence decay constant in D<sub>2</sub>O extrapolated from the plot. A' is the lanthanide specific constant, which is 5 for Tb<sup>3+</sup>.

# Peptides

## A. AbASide

RT: 0.00 - 10.58

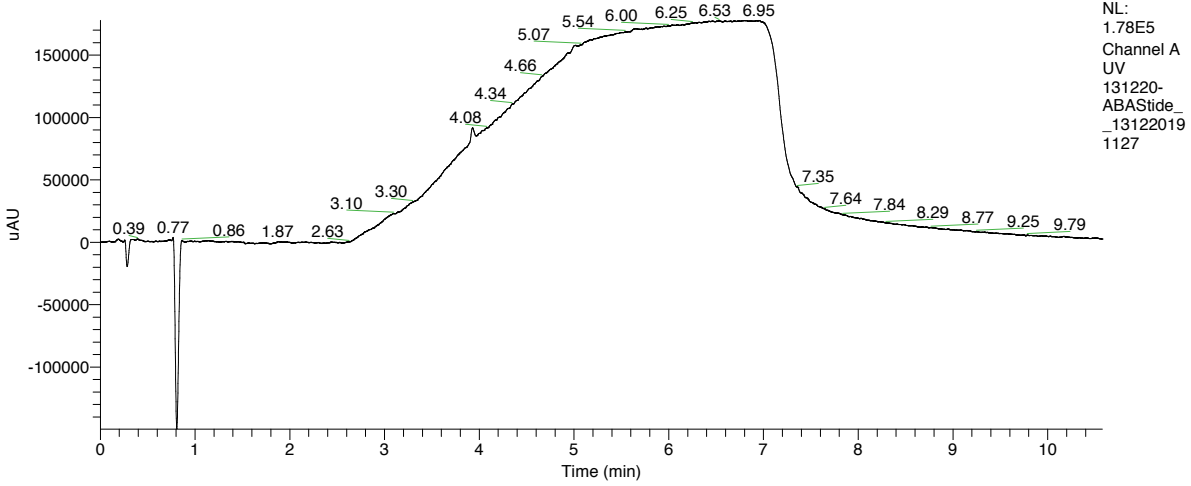

RT: 0.00 - 10.60

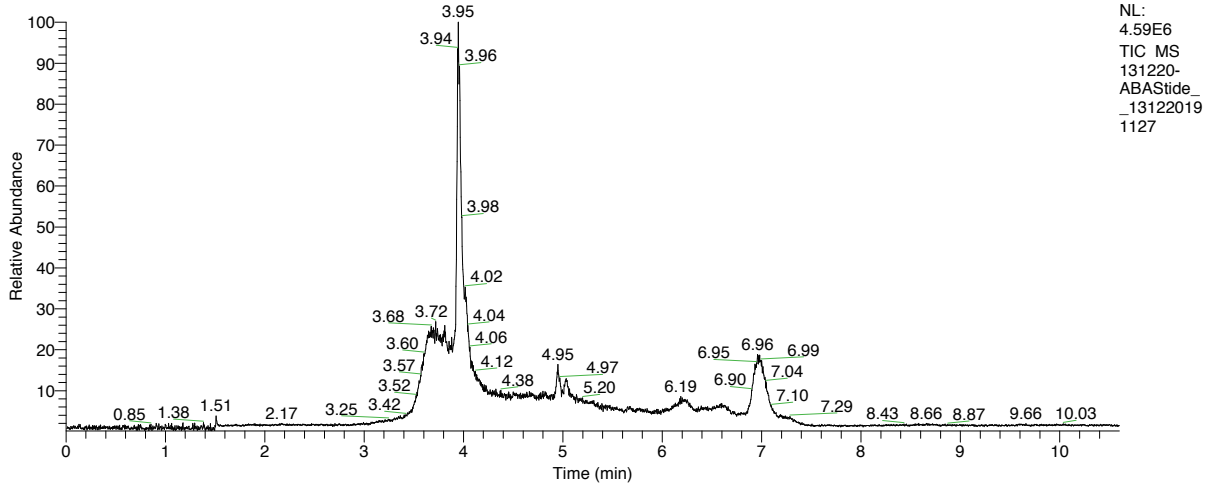

131220-ABASide\_131220191127 #1164-1205 RT: 3.91-4.05 AV: 42 NL: 1.49E4  
T: ITMS + p ESI Full ms [400.00-2000.00]

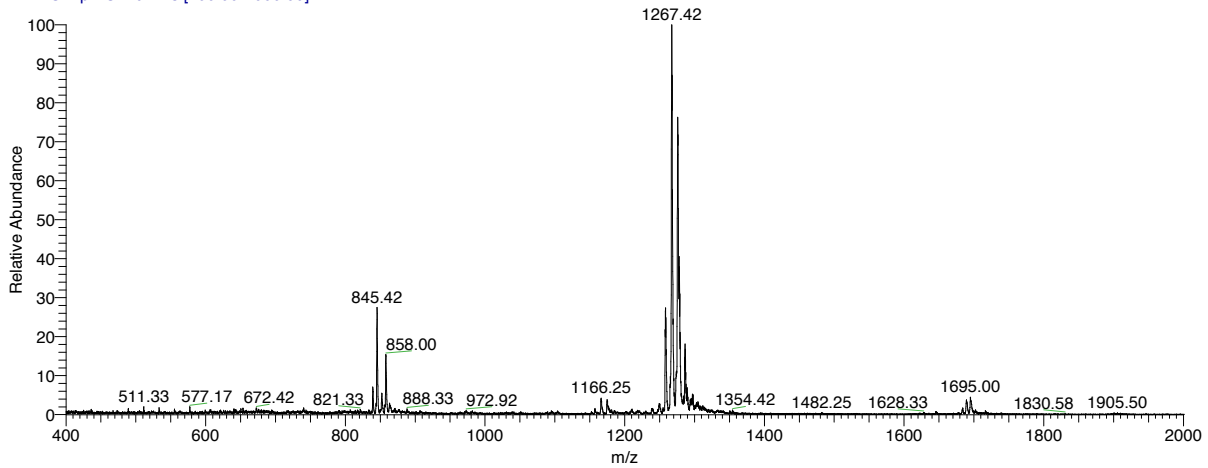

## B. pAbAstide

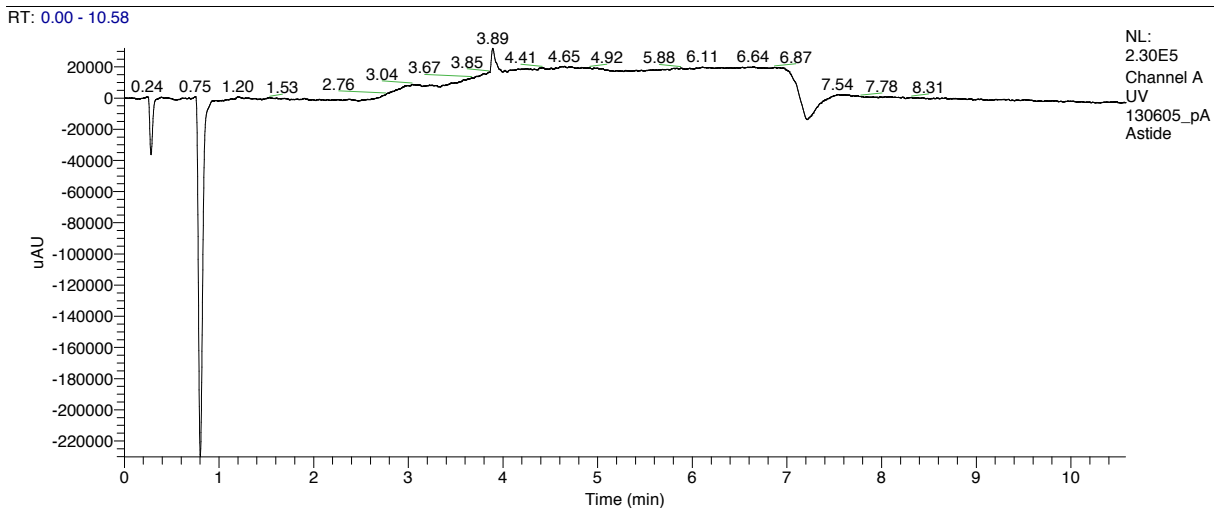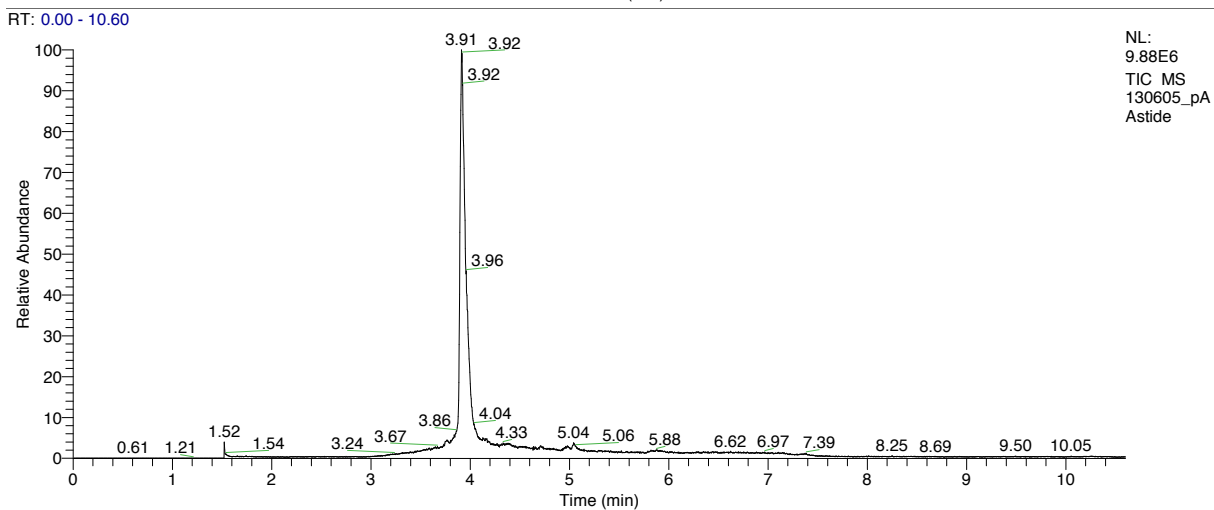

130605\_pAAstide #1149-1191 RT: 3.87-4.00 AV: 43 NL: 4.28E4  
T: ITMS + p ESI Full ms [400.00-2000.00]

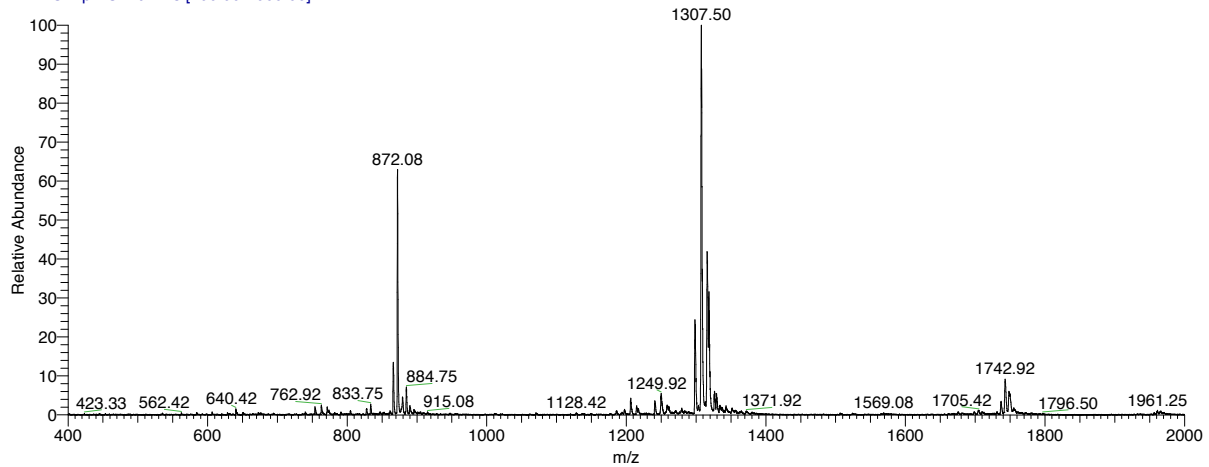

# C. JAS tide-A

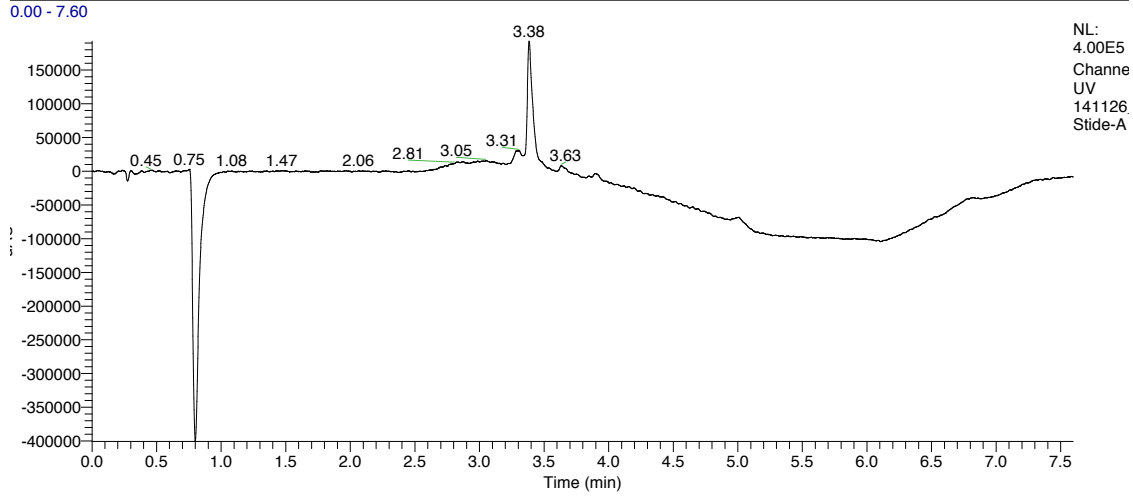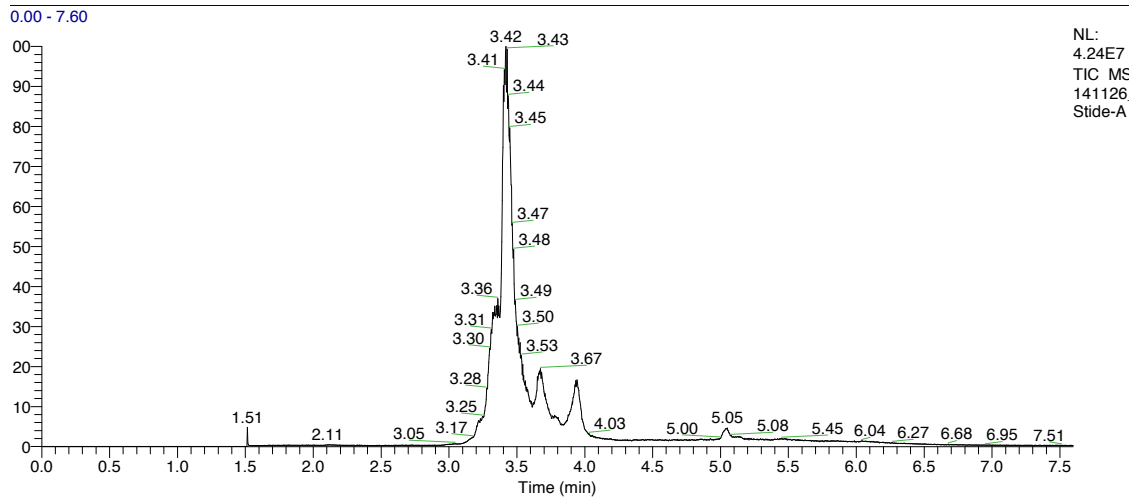

126\_JAS tide-A #998-1028 RT: 3.35-3.44 AV: 31 NL: 9.20E5  
MS + p ESI Full ms [400.00-2000.00]

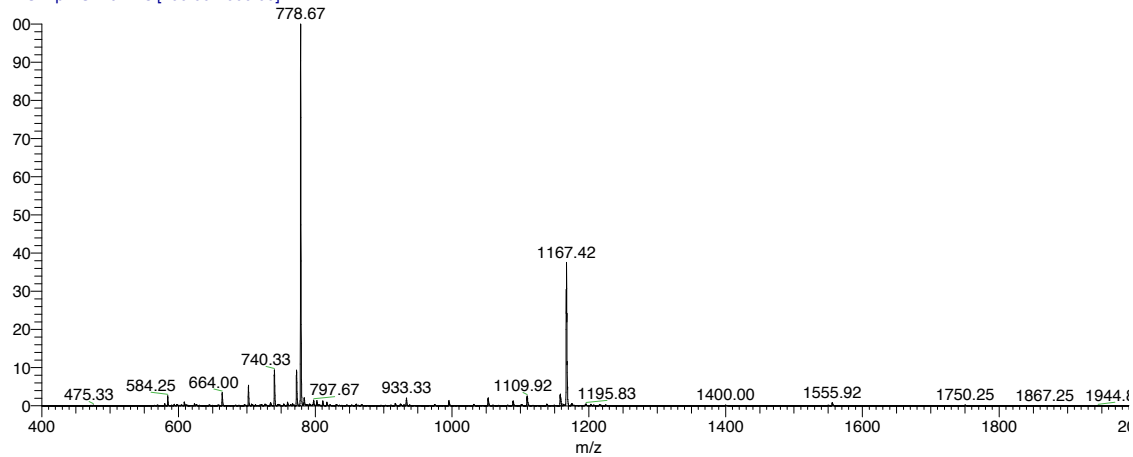

# D. JASride-B

RT: 0.00 - 7.60

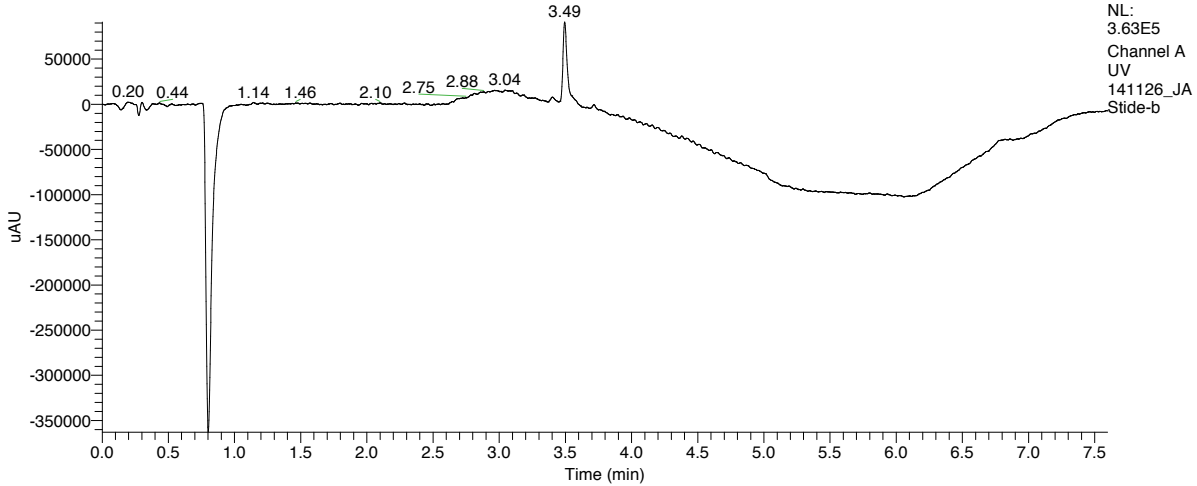

RT: 0.00 - 7.60

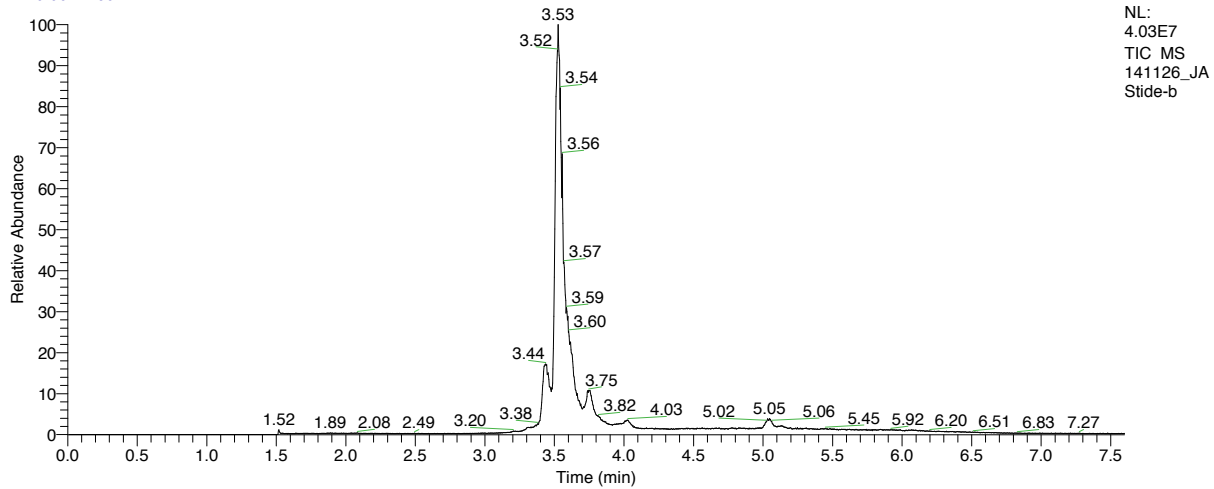

141126\_JASride-b #1027-1062 RT: 3.45-3.56 AV: 36 NL: 8.02E5  
T: ITMS + p ESI Full ms [400.00-2000.00]

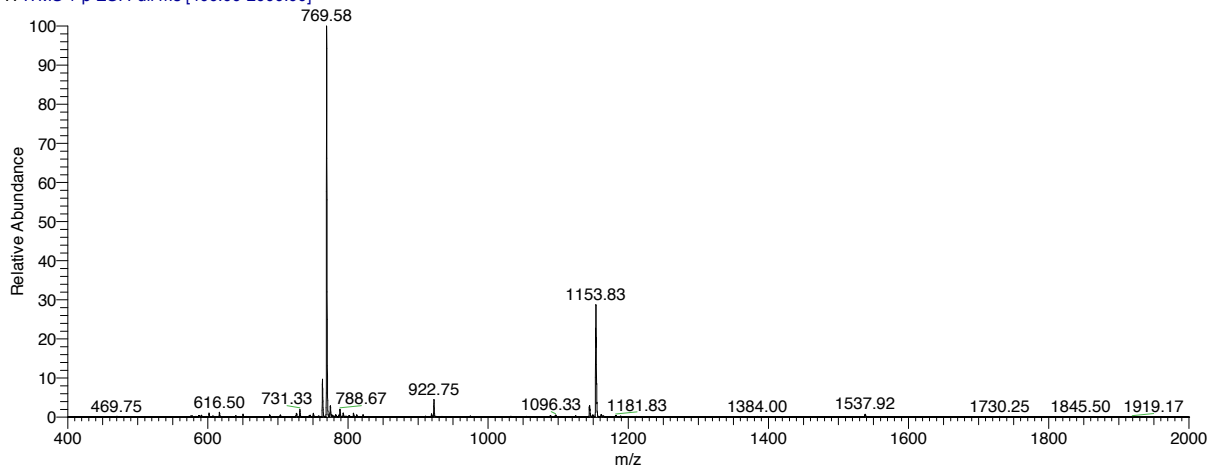

# E. pJAStide-B

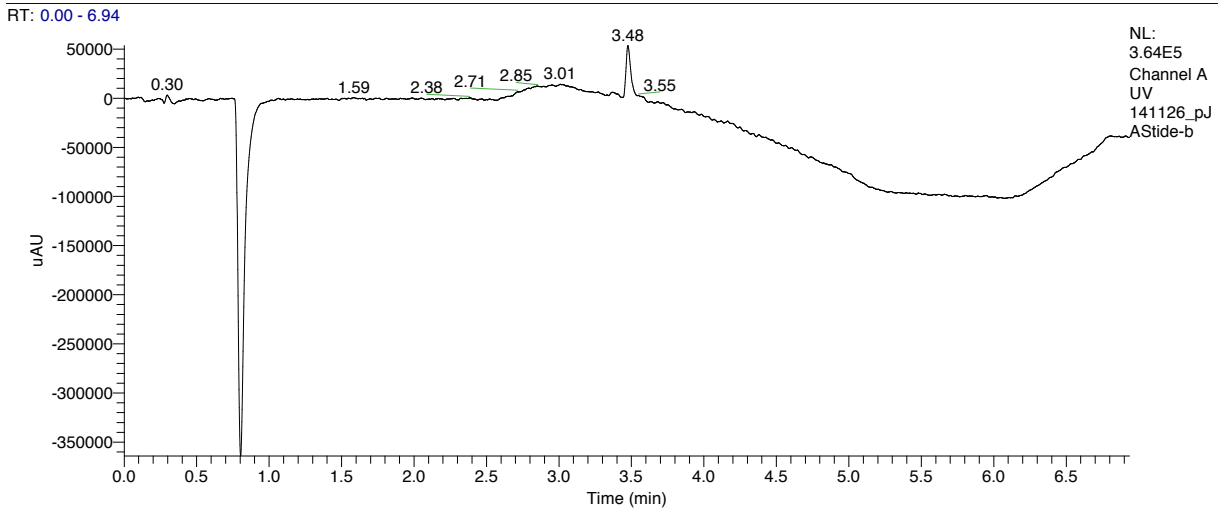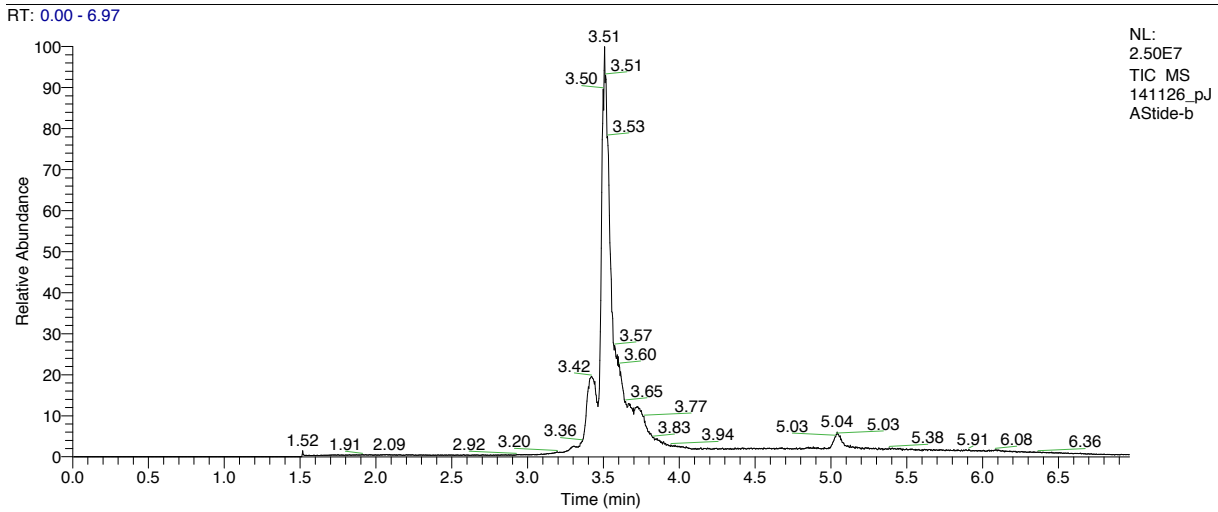

141126\_pJAStide-b #1023-1050 RT: 3.44-3.52 AV: 28 NL: 3.37E5  
T: ITMS + p ESI Full ms [400.00-2000.00]

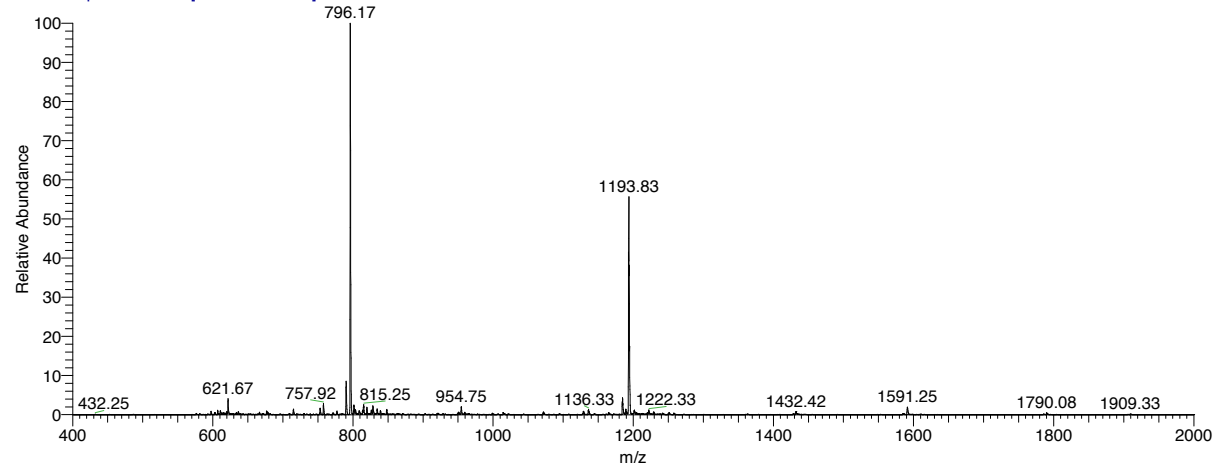

# F. JAS tide-C

RT: 0.00 - 7.60

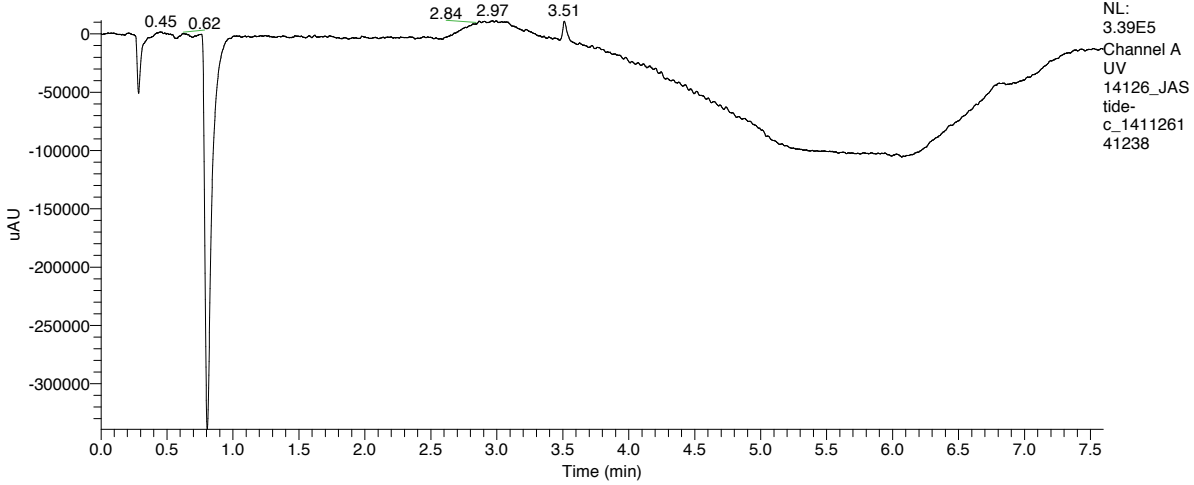

RT: 0.00 - 7.60

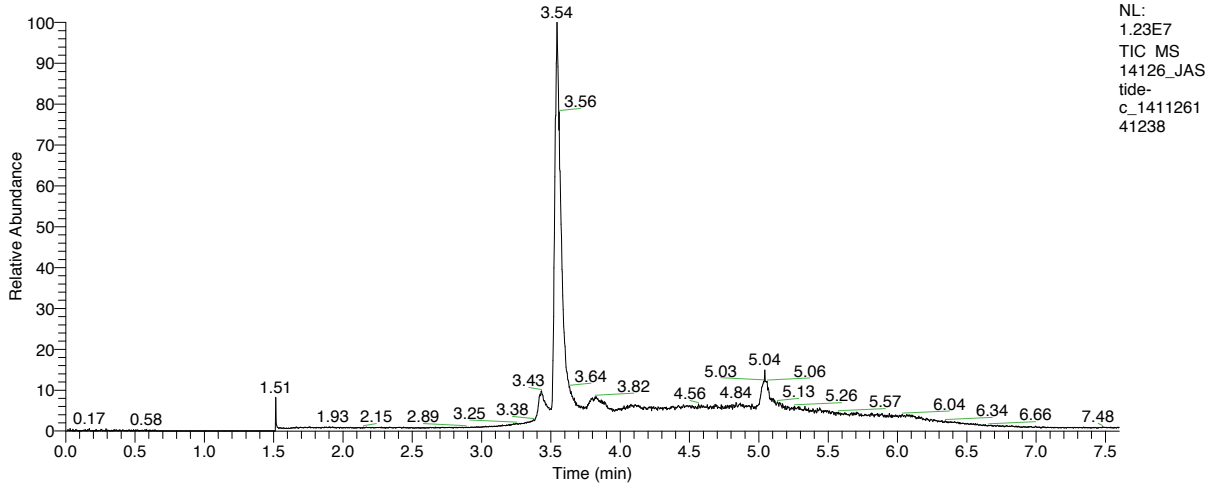

14126\_JAS tide-c\_141126141238 #1035-1058 RT: 3.48-3.55 AV: 24 NL: 1.80E5  
T: ITMS + p ESI Full ms [400.00-2000.00]

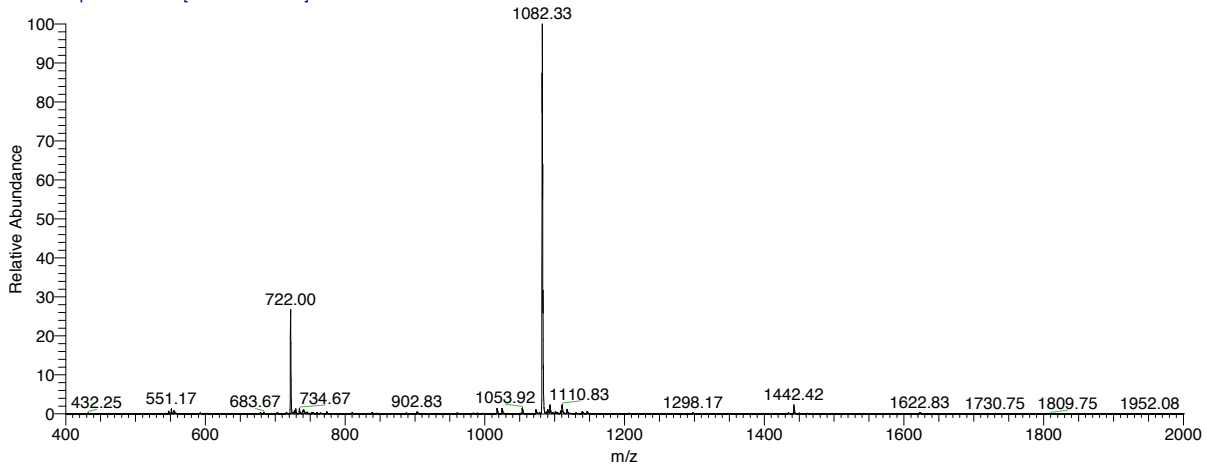



# G. JASide-D

RT: 0.00 - 7.60

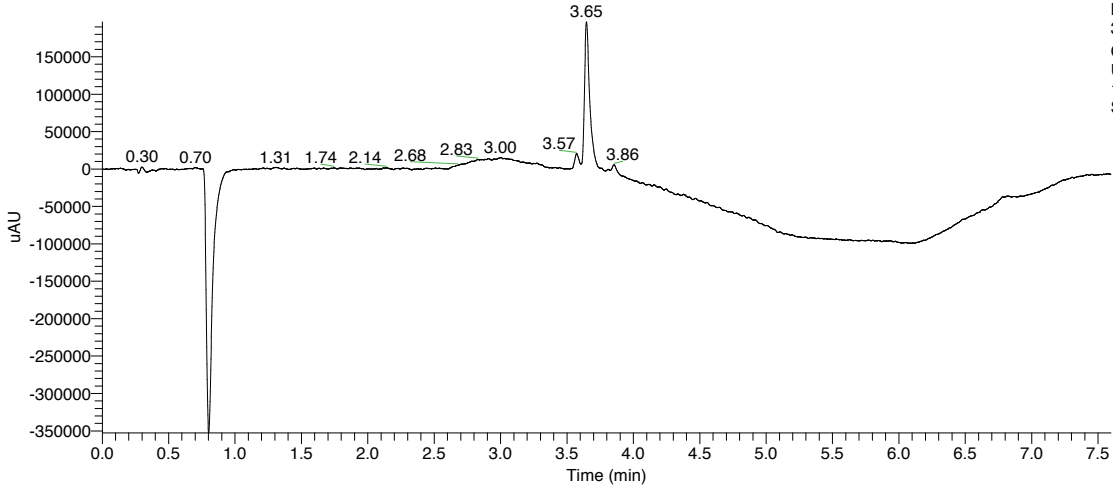

NL:  
3.53E5  
Channel A  
UV  
141126\_JA  
Stide-d

RT: 0.00 - 7.60

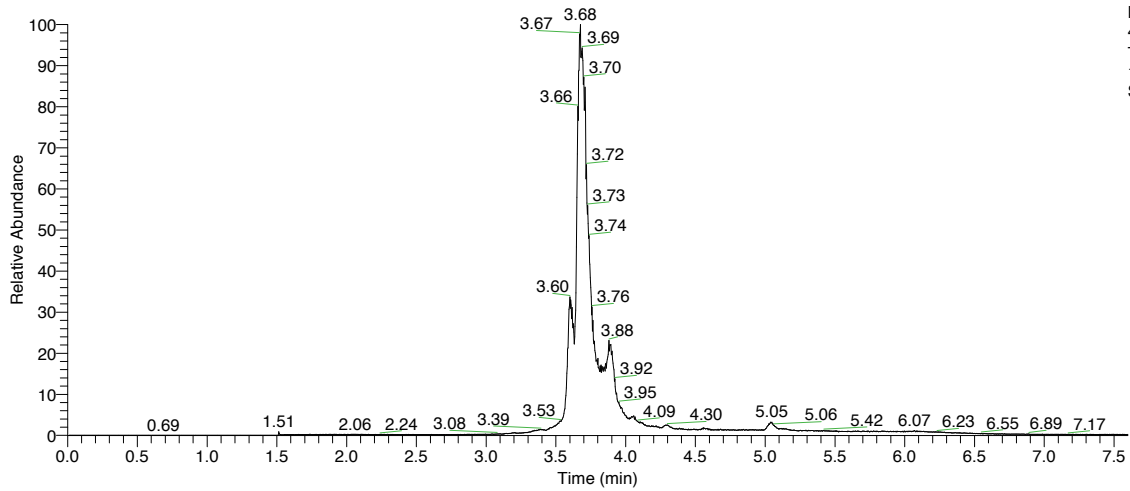

NL:  
4.88E7  
TIC MS  
141126\_JA  
Stide-d

141126\_JASide-d #1073-1114 RT: 3.60-3.73 AV: 42 NL: 1.09E6

T: ITMS + p ESI Full ms [400.00-2000.00]

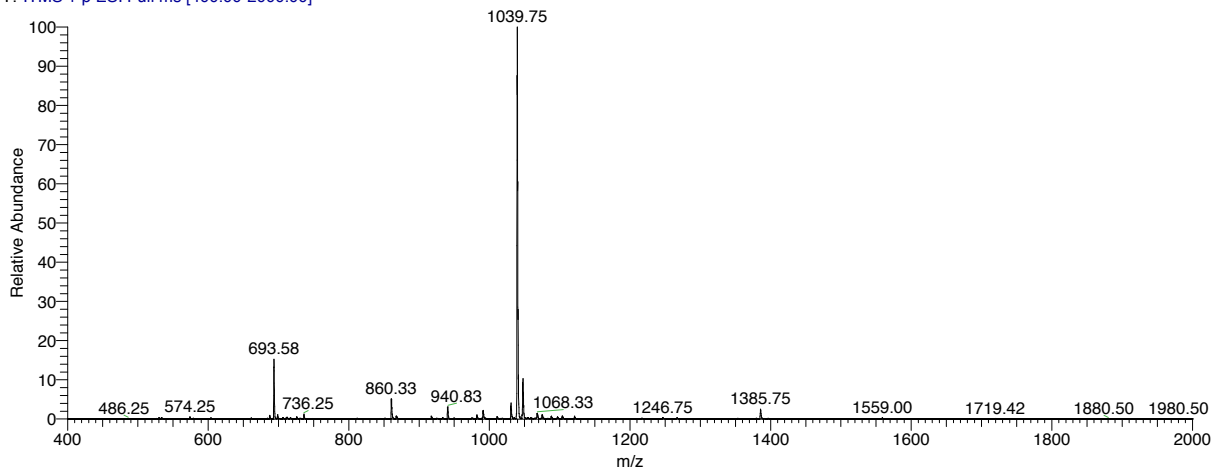

# H. JAStide-E

RT: 0.00 - 10.58

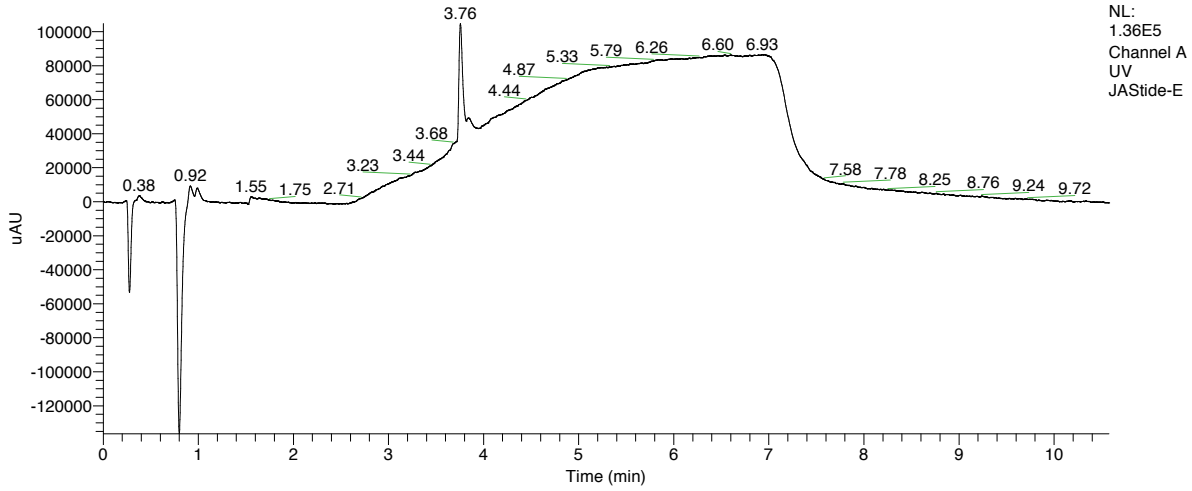

RT: 0.00 - 10.60

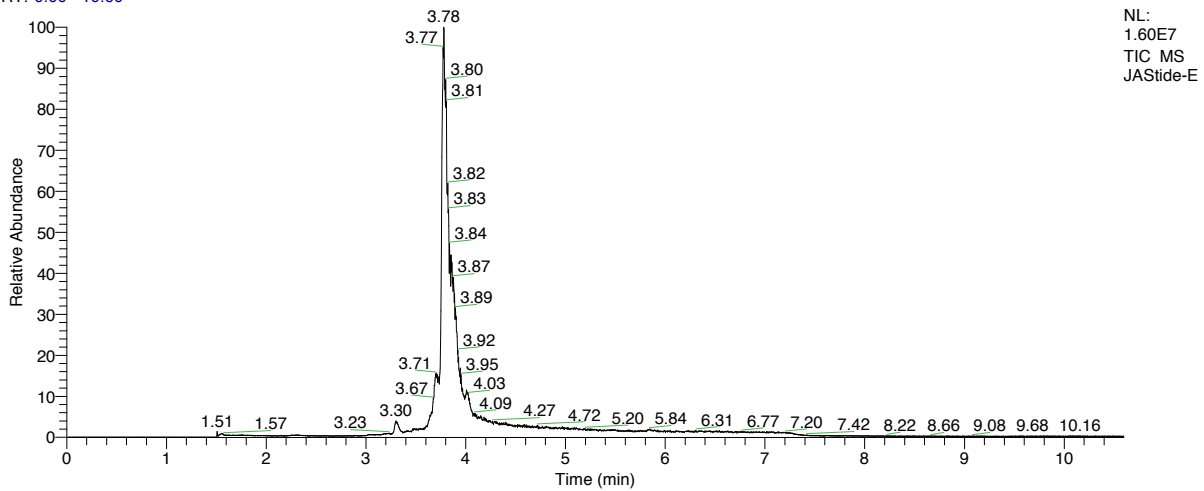

JAStide-E #1108-1134 RT: 3.72-3.81 AV: 27 NL: 1.67E5

T: ITMS + p ESI Full ms [400.00-2000.00]

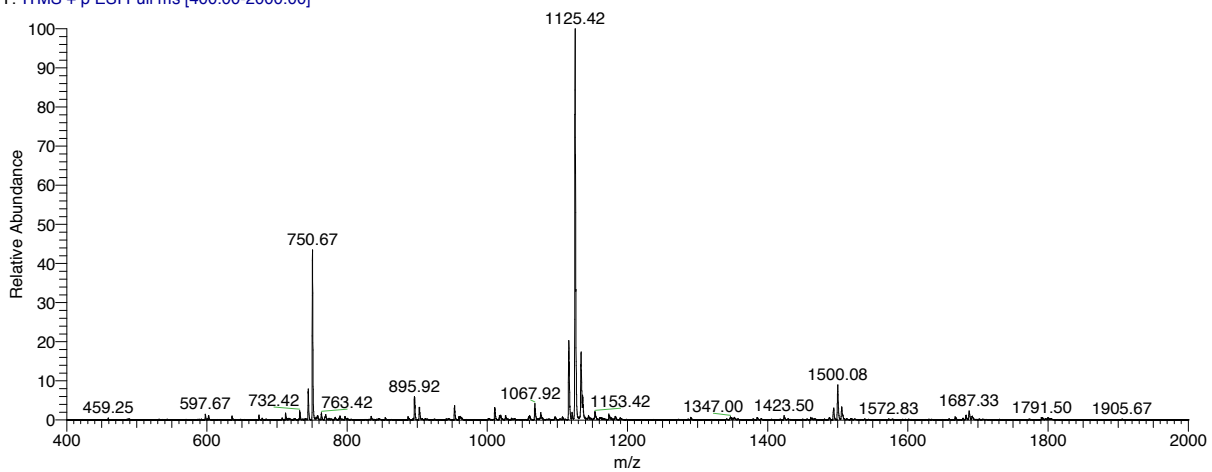

# I. pJAStide-E

RT: 0.00 - 10.58

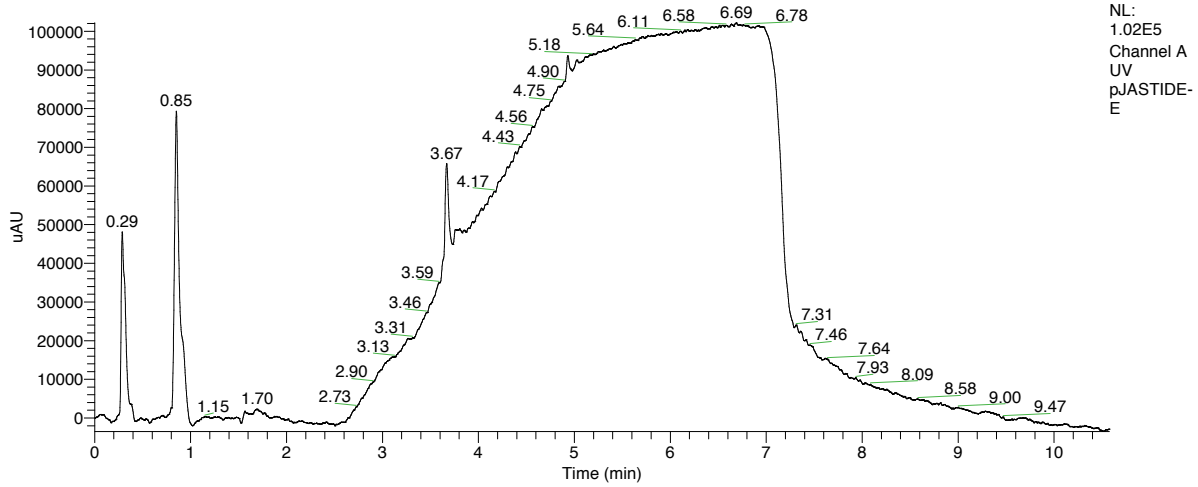

RT: 0.00 - 10.60

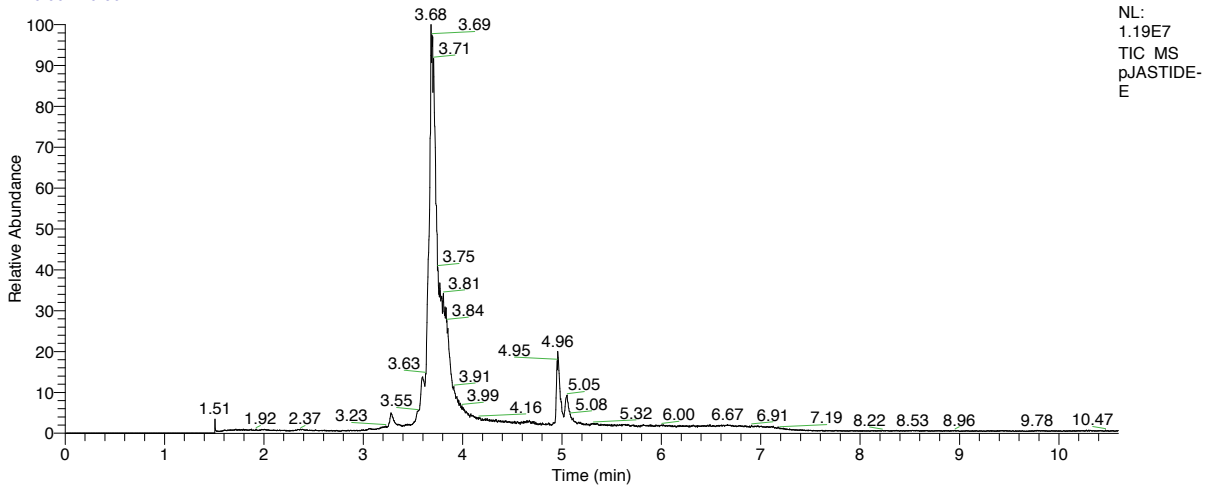

pJAStide-E #1086-1118 RT: 3.65-3.75 AV: 33 NL: 8.18E4  
T: ITMS + p ESI Full ms [400.00-2000.00]

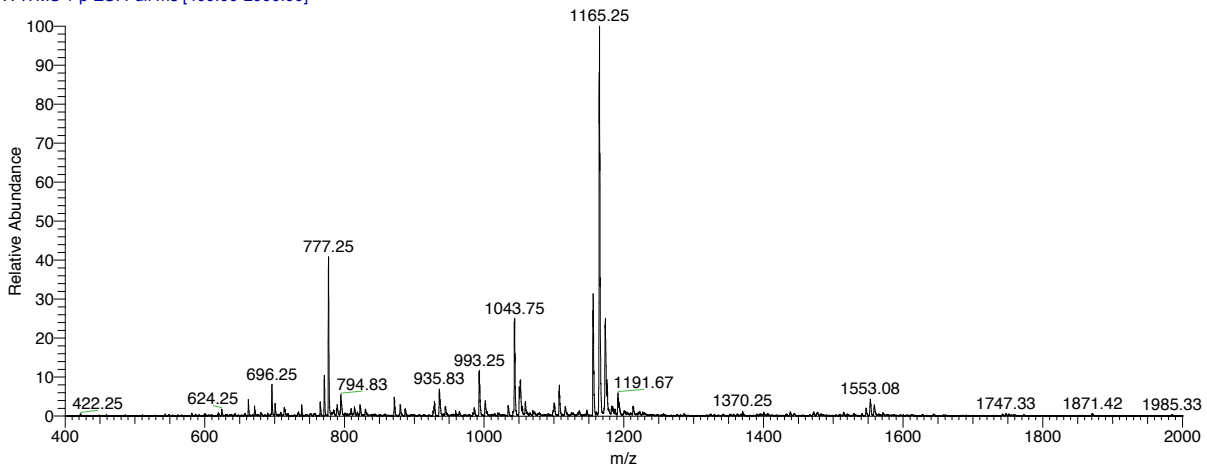

# J. SFAS tide-A

RT: 0.00 - 7.60

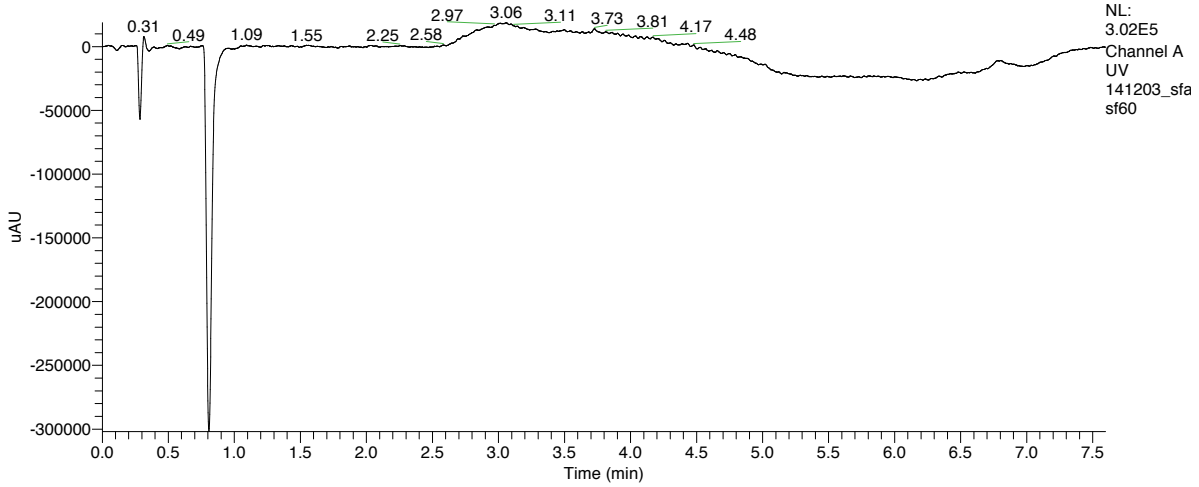

RT: 0.00 - 7.60

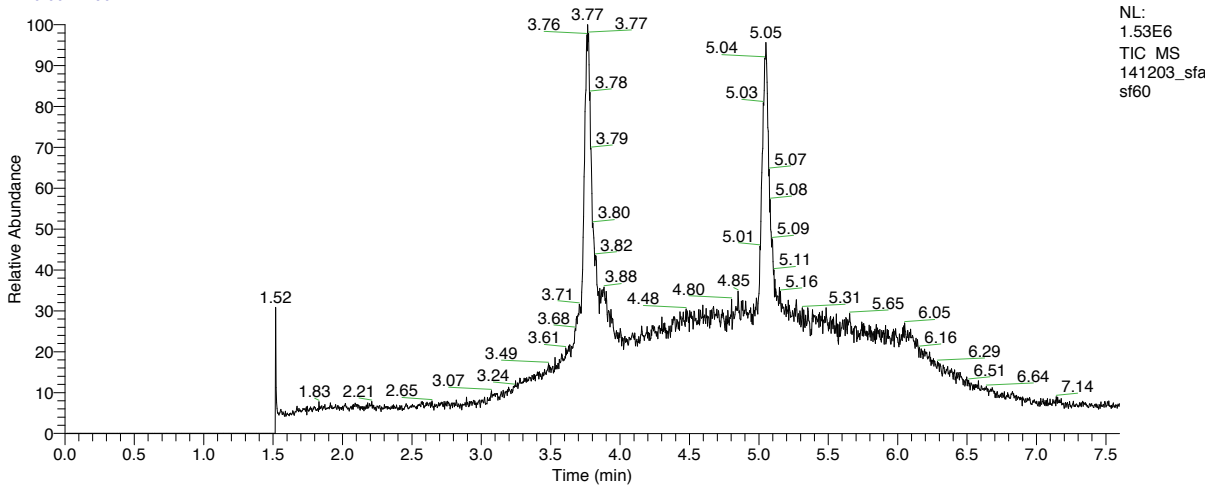

141203\_sfasf60 #1111-1133 RT: 3.73-3.81 AV: 23 NL: 8.32E3  
T: ITMS + p ESI Full ms [400.00-2000.00]

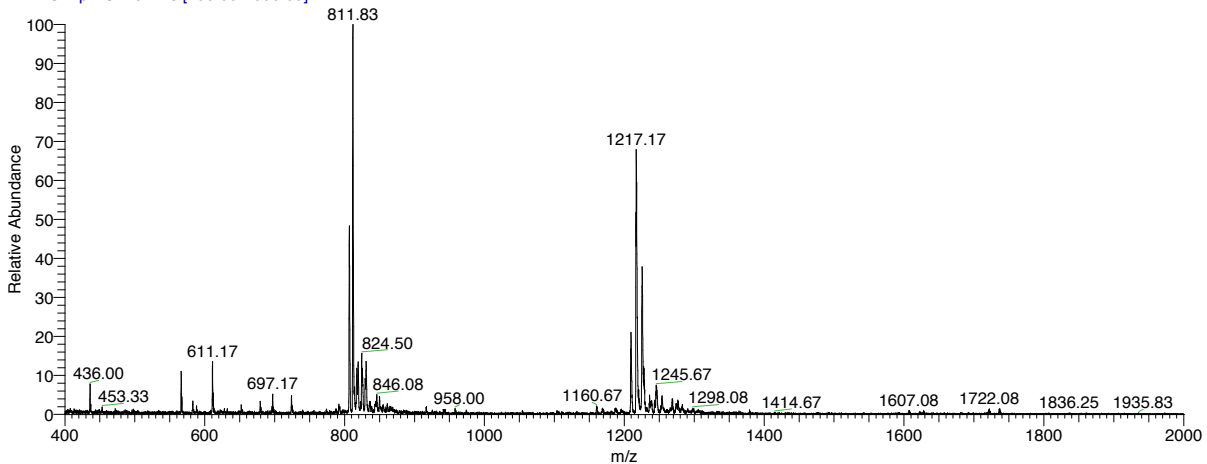

# K. pSFAS tide-A

RT: 0.00 - 7.60

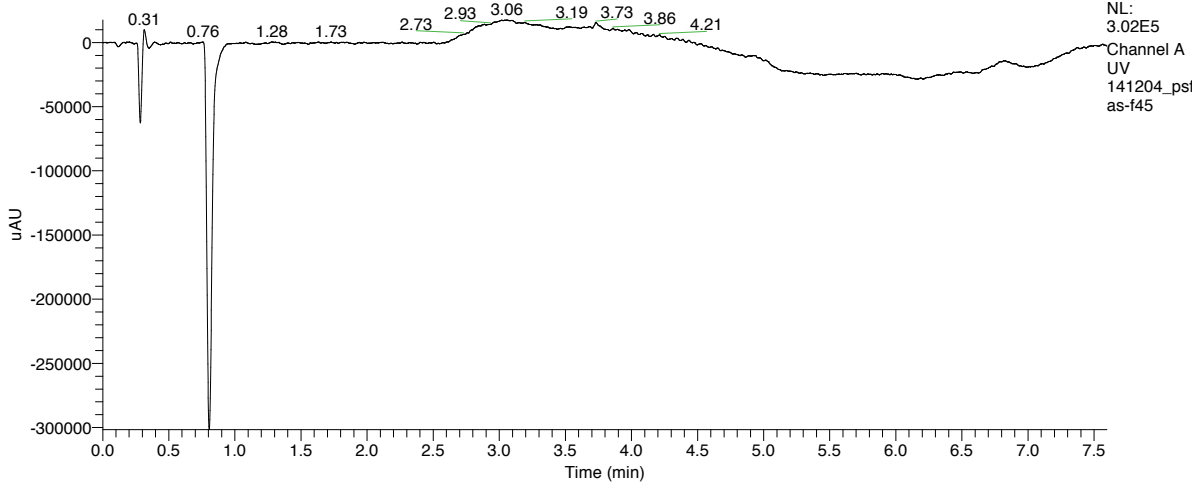

RT: 0.00 - 7.60

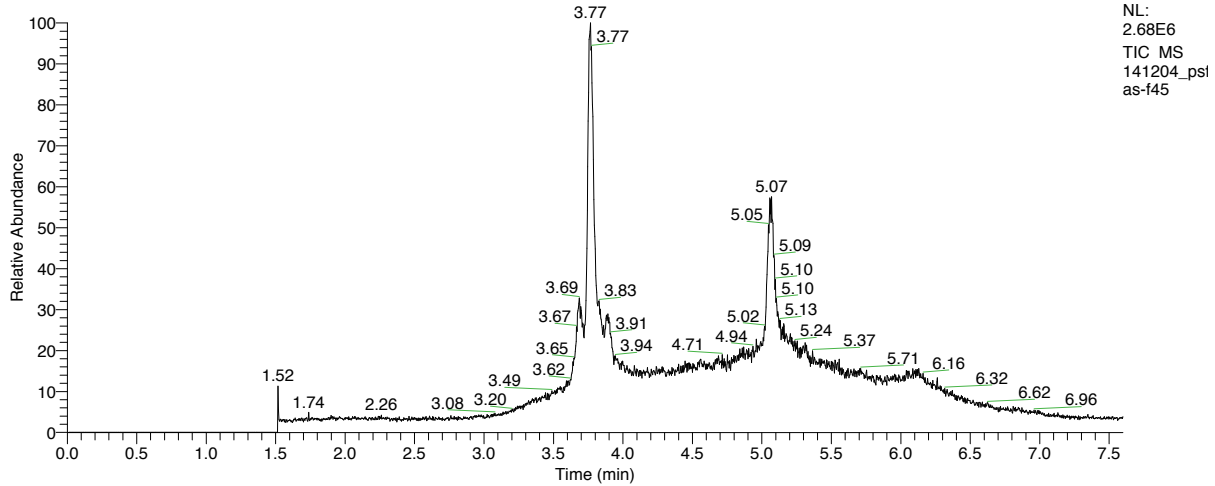

141204\_psfas-f45 #1110-1130 RT: 3.73-3.80 AV: 21 NL: 2.04E4  
T: ITMS + p ESI Full ms [400.00-2000.00]

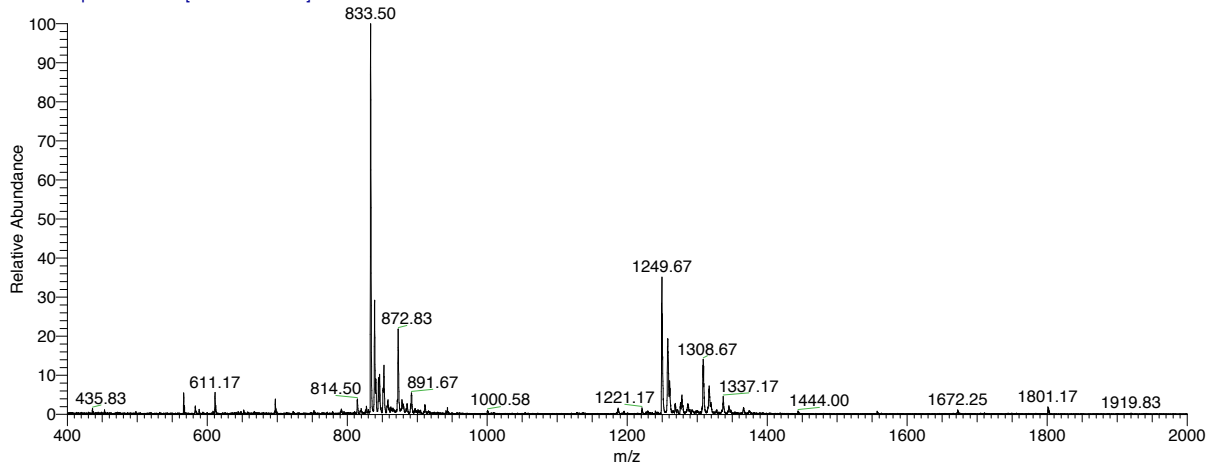

L. SAS tide

RT: 0.00 - 10.58

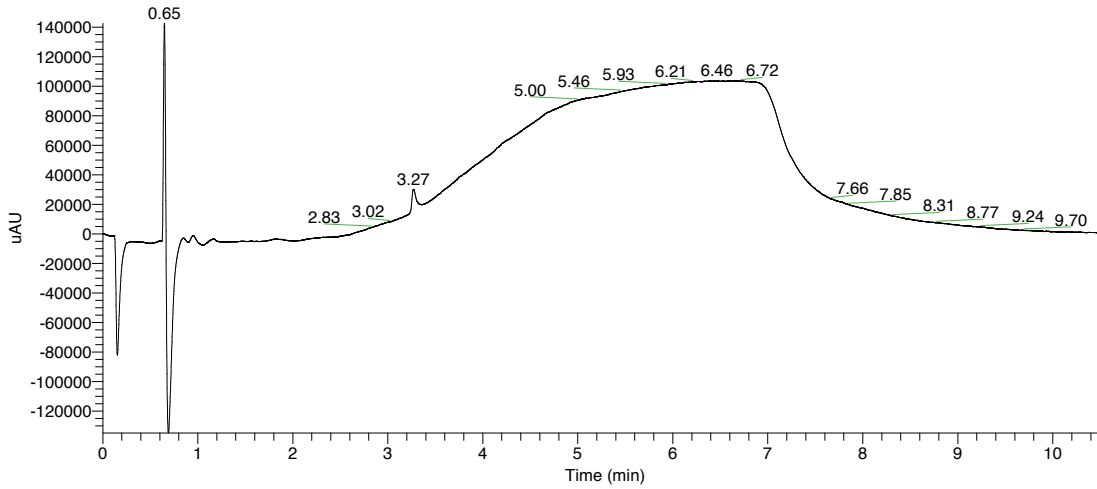

NL:  
1.42E5  
Channel A  
UV  
120627\_sa  
stide2

RT: 0.00 - 10.60

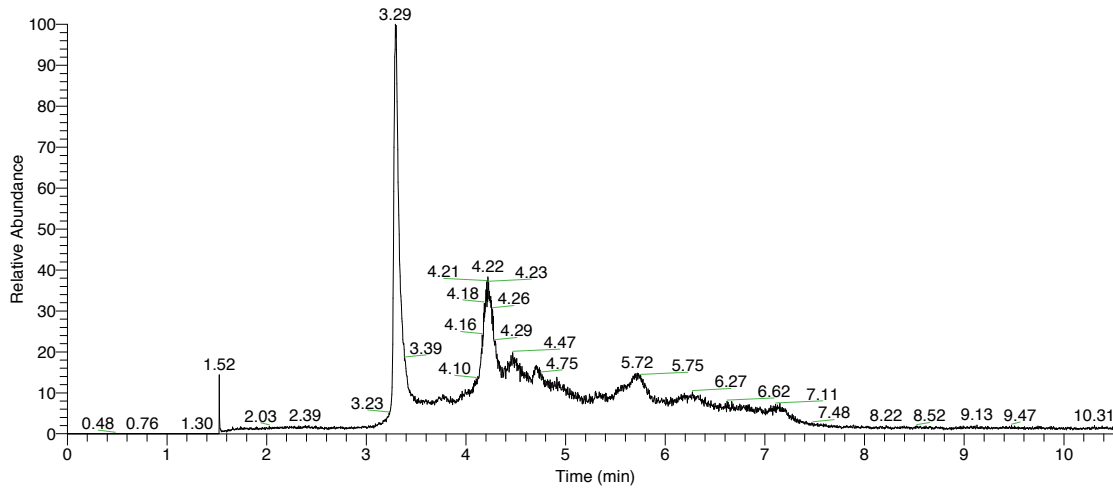

NL:  
2.40E6  
TIC MS  
120627\_sa  
stide2

120627\_sastide2 #964-1028 RT: 3.24-3.46 AV: 65 NL: 1.33E4  
T: ITMS + p ESI Full ms [400.00-2000.00]

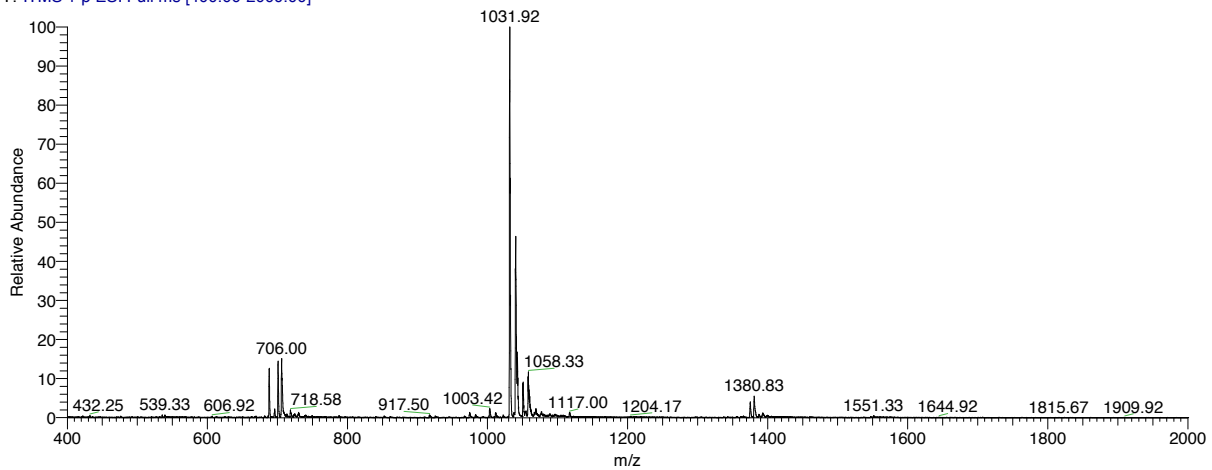

**Table S1. Abl substrate motifs**

| Kinase | Method | -4 | -3 | -2 | -1      | +1 | +2 | +3  | +4 | Ref                    |
|--------|--------|----|----|----|---------|----|----|-----|----|------------------------|
| Abl    | DPL    | A  | X  | V  | I/V/L/F | A  | A  | P/F | F  | Songyang,<br>Z. et al. |

|  |                      |           |               |         |         |         |         |           |       |                                                           |
|--|----------------------|-----------|---------------|---------|---------|---------|---------|-----------|-------|-----------------------------------------------------------|
|  |                      |           |               |         |         |         |         |           |       | Nature (1995), 373, 536-539                               |
|  | Microarray           | P         | E/S           | Q/N     | I/L     | A       | F/S     | P         | R/W   | Rychlewski, L. et al. J. Mol. Biol. (2004), 336, 307-311. |
|  | NetPhorest           | N/G/A/E/S | S/G/E/P/D/Q/A | P/G     | V       | A       | Q/T/S   | P/Y       | V/S   | Miller, M.L. et al. Sci Signal. (2008), 1, ra2            |
|  | One-bead-one-peptide |           | X             | V       | I       | A       | A       | P         | F     | Wu, J.J. et al. Bioorg Med Chem Lett. (1998), 8, 2279-84. |
|  |                      |           | E             | E       | I       | E       | E       | P         | Y     |                                                           |
|  |                      | E         | D             | A       | I       |         |         |           |       |                                                           |
|  | KINATEST-ID          | E/D/G     | D/V/P/E/H     | V/I/G/S | I/V/F/H | Q/A/D/I | T/P/Q/S | P/W/F/V/I | P/D/W | This work                                                 |

**Table S2. Btk substrate motifs**

| Kinase | Method      | -4        | -3      | -2      | -1      | +1      | +2        | +3      | +4      | Ref                                               |
|--------|-------------|-----------|---------|---------|---------|---------|-----------|---------|---------|---------------------------------------------------|
| Btk    | M3          | S/V/D/E/I | E/L/N/D | A/D/K/P | I/L/D/E | D/V/G/L | S/E/D/V   | X       | L/S/E/P | Newman, R.H. et al. Mol. Syst. Biol. (2013) 9:655 |
|        | KINATEST-ID | V/W/S/E   | L/N/D/V | A/D     | I/L     | D/V     | I/S/V/T/E | C/G/H/P | L/R/V/S | This work                                         |

**Table S3. Csk substrate motifs**

| Kinase | Method      | -4        | -3  | -2        | -1      | +1      | +2        | +3        | +4      | Ref                                                      |
|--------|-------------|-----------|-----|-----------|---------|---------|-----------|-----------|---------|----------------------------------------------------------|
| Csk    | DPL         | X         | E   | P/V       | I/V/L   | M/I/F   | F/I       | F/I/L     | F/I     | Ruzzene, M. et al. Eur. J. Biochem. (1997), 246, 433-439 |
|        | M3          | T/E/A/N/P | E/F | P/G/E/A/D | Q/I/V/D | Q/I/E/S | P/F/Q/V/E | G/Q/T/E/L | E/P/D/Y | Newman, R.H. et al. Mol. Syst. Biol. 9:655               |
|        | KINATEST-ID | T/D       | E/Q | P/S/V/C   | I/Q/V   | Q/F/M/A | E/I/Q/S   | F/P       | F/K/N/T | This work                                                |

**Table S4. Fes/Fer substrate motifs.**

| Kinase | Method      | -4      | -3    | -2    | -1        | +1    | +2      | +3        | +4        | Ref                                             |
|--------|-------------|---------|-------|-------|-----------|-------|---------|-----------|-----------|-------------------------------------------------|
| Fes    | DPL         | E/A/D   | E/A   | E/A/G | I/E/V/D/L | E/D/A | E/D/I/V | I/V/E/M/L | E/I/V/D/G | Songyang, Z. et al. Nature (1995), 373, 536-539 |
|        | KINATEST-ID | N/M/D/T | D/E/Q | P/G   | I/V/F/D   | E/T/Q | D/N/T   | V/I/T     | E/G/R     | This work                                       |

**Table S5. Jak2 substrate motifs.**

| Kinase | Method   | -4      | -3      | -2      | -1      | +1        | +2        | +3      | +4      | Ref                                  |
|--------|----------|---------|---------|---------|---------|-----------|-----------|---------|---------|--------------------------------------|
| Jak2   | PAM Chip | E/D/A/L | D/N/G/V | A/D/P/H | E/D/T/H | L/I/Y/V/T | K/Y/I/R/Q | L/V/P/A | D/A/S/L | Sanz, A. et al. PLoS One, (2011), 6, |

|  |             |           |           |         |       |         |             |           |         |                                                          |
|--|-------------|-----------|-----------|---------|-------|---------|-------------|-----------|---------|----------------------------------------------------------|
|  |             |           |           |         |       |         |             |           |         | e18522.                                                  |
|  | NetPhorest  | T/A/L/S/I | S/D/Q/I   | D/A/K/L | D/E/P | L/A/Y/V | K/V/T/P     | V/L/T/E/P | S/K/V/D | Miller, M.L. et al. <i>Sci Signal.</i> (2008), 1, ra2    |
|  | M3          | A         | I/D       | D/E     | X     | L/V/T   | K/A/P/Q/V   | V/P/L/M   | D/L     | Newman, R.H. et al. <i>Mol. Syst. Biol.</i> (2013) 9:655 |
|  | KINATEST-ID | K/D/R     | D/I/N/M/P | D/M/P/K | D/E/R | L/I/V/F | I/K/Q/T/P/V | L/V/P/T   | D/P/S/K | This work                                                |

**Table S6. Src family kinase substrate motifs.**

| Kinase | Method        | -4          | -3        | -2        | -1        | +1        | +2        | +3          | +4      | Ref                                                             |
|--------|---------------|-------------|-----------|-----------|-----------|-----------|-----------|-------------|---------|-----------------------------------------------------------------|
| Fyn    | Phage Display |             |           | E         | T/φ       | G         | X         | I/V/L       |         | Dente, L. et al. <i>J. Mol. Biol.</i> (1997) 269, 694-703       |
|        | M3            | D/E         | D/E       | X         | V/L/T     | E/D       | D/T       | V/P/L       | X       | Newman, R.H. et al. <i>Mol. Syst. Biol.</i> (2013) 9:655        |
|        | KINATES T-ID  | D/P/G/M/W/E | E/D/K/Q   | N/D/G/S/E | I/V/L     | G/D/E/S   | T/S/D/M/I | F/I/V/L     | X       | This work                                                       |
| Lyn    | DPL           | D/E         | E/D       | E/D       | I/V/L     | E/G/D     | E         | L/IV        | E       | Ruzzene, M. et al. <i>Eur. J. Biochem.</i> (1997), 246, 433-439 |
|        | Phage Display |             | D/E       | X         | I/L       | E/D       | X         | L           | P       | Schmitz, R. J. et al. <i>Mol. Biol.</i> (1996), 260, 664-77.    |
|        | M3            | E/D         | E/K       | D/N       | D/T/L     | E/L/D     | D/N/T     | V/P/M       | D       | Newman, R.H. et al. <i>Mol. Syst. Biol.</i> (2013) 9:655        |
|        | KINATES T-ID  | D/E/S/K/G   | E/D/K/V/I | D/N/G/T/E | I/V/L/T/F | E/G/D/A/V | F/S/T/E   | L/I/V/P/W/F | P/W     | This work                                                       |
| Hck    | M3            | E/T/D       | G/P/K/S   | L/S/A/D   | X         | D/Q/V/I   | A/P/K     | P/V/I/R     | A/E/P/V | Newman, R.H. et al. <i>Mol. Syst. Biol.</i> (2013) 9:655        |
|        | KINATES T-ID  | E/W/D/K     | H/P/D/E   | D/S/R/A   | V/I/L     | T/H/S/D/V | F/K/S/V/A | F/V/P/I/L   | V/A/P/N | This work                                                       |
| Lck    | DPL           | X           | E         | X         | I/V/L/F   | G/A       | V         | L/V/F/I     | F/L/V/I | Songyan g, Z. et al. <i>Nature</i> (1995), 373, 536-            |



|     |                      |           |             |           |             |           |         |           |         |                                                                   |
|-----|----------------------|-----------|-------------|-----------|-------------|-----------|---------|-----------|---------|-------------------------------------------------------------------|
|     |                      |           |             |           |             |           |         |           |         | 539                                                               |
|     | M3                   | E/D       | D/E/L       | D/S/E     | X           | D/E       | X       | L/P/V     | X       | Newman, R.H. et al. Mol. Syst. Biol. (2013) 9:655                 |
|     | KINATES T-ID         | V/D/Q/P   | D/E/N/S     | D/S/N/E/A | I/V/L       | D/G/T/W/E | S/M/T/N | I/M/L/V   | R/P/M/T | This work                                                         |
| Src | DPL                  | D         | E/D         | E/D/G     | I/V/L       | G/E/D     | E       | F/I/L/V   | D/E     | Songyan g, Z. et al. Nature (1995), 373, 536-539                  |
|     | One-bead-one-peptide |           |             | E/N/I/L   | I/L/D/E     | E/I/L     | E/D     |           |         | Kim, Y.G. et al. Angew. Chem. Int. ed. Engl. (2007), 46, 5408-11. |
|     | KINATES T-ID         | E/D/N/P   | E/D/S/N/A/Q | D/E/G/S   | I/V/L/T/E/D | G/E/D     | E/V/A/I | F/M/V/I   | X       | This work                                                         |
| Yes | M3                   | E/D/S/A   | D/E/S       | A/P/Q/T   | X           | E/A/G     | A/T/P   | P/V/A     | A/E/P   | Newman, R.H. et al. Mol. Syst. Biol. (2013) 9:655                 |
|     | KINATES T-ID         | D/E/T/A/S | E/D/S       | D/E/G/H   | I/V/L/T     | E/S/T/G/D | V/A/T/S | V/L/P/F/I | G/N/W/H | This work                                                         |

**Table S7. Syk substrate motifs.**

| Kinase      | Method              | -4      | -3      | -2      | -1      | +1      | +2      | +3      | +4        | Ref                                                      |
|-------------|---------------------|---------|---------|---------|---------|---------|---------|---------|-----------|----------------------------------------------------------|
| Syk         | DPL                 | E/D     | E/D     | E       | E/D/I   | E/V/I   | E/V/I   | I/V/E   | V/I/E     | Ruzzene, M. et al. Eur. J. Biochem. (1997), 246, 433-439 |
|             | Positional Scanning | E/D     | E/D     | X       | E/D     | X       | X       |         |           | Kim, J.-Y. et al. Immuno. Lett. (2011), 135, 151-157     |
|             | NetPhorest          | D/T/S/E | D/E/S/Q | D/E/S/N | D/E/P   | E/V/D/L | D/E/T/N | V/P/L/A | D/N       | Miller, M.L. et al. Sci Signal. (2008), 1, ra2           |
|             | Sequence Alignment  | D       | E       | E       | D       | E       | X       | P       | X         | Geahlen, R.L. BBA (2009), 1793, 1115-27                  |
|             | Phage Display       | X       | X       | X       | D       | E       | X       | X       | X         | Schmitz, R. J. et al. Mol.Biol. (1996), 260, 664-77.     |
|             | KALIP               | L/E/D/P | E       | N/E/L/D | D/E/A/L | E       | A/D/E/S | V/I/L/S | G/K/I/L   | Xue, L. et al. PNAS (2012), 109, 5615-20.                |
|             |                     | D/E/A/S | D/E/A/P | E/D/G/A | D       | E/V/D/L | E/V/D/L | D/K/L/P | V/K/P/T   |                                                          |
|             | M3                  | D/E/A/T | D/E/S/N | D/E/G/N | D/G/E   | E/V/D   | D/N/T   | P/V/L/A | X         | Newman, R.H. et al. Mol. Syst. Biol. (2013) 9:655        |
| KINATEST-ID | D                   | D/E     | D/E     | D       | E       | D/N     | P/V     | X       | This work |                                                          |

**Table S8. Site Selectivity Matrix (SSM).**

| <b>Kinase</b>   | <b>-4</b>   | <b>-3</b>   | <b>-2</b>   | <b>-1</b>   | <b>+1</b>   | <b>+2</b>   | <b>+3</b>   | <b>+4</b>   |
|-----------------|-------------|-------------|-------------|-------------|-------------|-------------|-------------|-------------|
| <b>Abl</b>      | <b>0.48</b> | <b>0.41</b> | <b>0.66</b> | <b>1.05</b> | <b>0.35</b> | <b>0.42</b> | <b>2.31</b> | <b>0.16</b> |
| <b>Arg</b>      | <b>1.08</b> | <b>0.76</b> | <b>1.58</b> | <b>1.88</b> | <b>1.17</b> | <b>0.88</b> | <b>2.96</b> | <b>1.8</b>  |
| <b>Btk</b>      | <b>1.73</b> | <b>1</b>    | <b>1.66</b> | <b>2.22</b> | <b>2.69</b> | <b>1.13</b> | <b>1.30</b> | <b>1.36</b> |
| <b>Csk</b>      | <b>1.29</b> | <b>2.49</b> | <b>1.16</b> | <b>1.38</b> | <b>1.57</b> | <b>0.97</b> | <b>0.78</b> | <b>0.65</b> |
| <b>Fak</b>      | <b>2.88</b> | <b>1.74</b> | <b>1.40</b> | <b>0.85</b> | <b>1.5</b>  | <b>1.15</b> | <b>1.66</b> | <b>1.3</b>  |
| <b>Fyn</b>      | <b>0.51</b> | <b>0.57</b> | <b>0.40</b> | <b>0.68</b> | <b>0.99</b> | <b>1.25</b> | <b>0.93</b> | <b>0.67</b> |
| <b>Hck</b>      | <b>1.36</b> | <b>1.02</b> | <b>0.76</b> | <b>1.24</b> | <b>1.13</b> | <b>0.87</b> | <b>1.41</b> | <b>1.38</b> |
| <b>Jak2</b>     | <b>1.20</b> | <b>1.42</b> | <b>0.96</b> | <b>1.98</b> | <b>1.02</b> | <b>0.60</b> | <b>1.55</b> | <b>0.87</b> |
| <b>Lck</b>      | <b>0.72</b> | <b>1.98</b> | <b>1.36</b> | <b>1.54</b> | <b>1.19</b> | <b>0.73</b> | <b>0.92</b> | <b>1.09</b> |
| <b>Lyn</b>      | <b>1.26</b> | <b>1.44</b> | <b>0.80</b> | <b>0.52</b> | <b>1.28</b> | <b>1.25</b> | <b>1.61</b> | <b>0.82</b> |
| <b>Pyk2</b>     | <b>1.36</b> | <b>1.55</b> | <b>1.24</b> | <b>2.13</b> | <b>1.92</b> | <b>1.64</b> | <b>3.13</b> | <b>1.56</b> |
| <b>Src</b>      | <b>0.60</b> | <b>0.97</b> | <b>0.78</b> | <b>0.52</b> | <b>0.59</b> | <b>0.00</b> | <b>0.82</b> | <b>0.14</b> |
| <b>Syk</b>      | <b>1.38</b> | <b>1.61</b> | <b>1.53</b> | <b>2.12</b> | <b>1.95</b> | <b>1.20</b> | <b>1.84</b> | <b>0.66</b> |
| <b>Yes</b>      | <b>1.40</b> | <b>1.89</b> | <b>1.30</b> | <b>1.12</b> | <b>1.13</b> | <b>1.24</b> | <b>1.08</b> | <b>0.69</b> |
| <b>Zap70</b>    | <b>1.45</b> | <b>1.71</b> | <b>1.46</b> | <b>2.22</b> | <b>2.20</b> | <b>1.60</b> | <b>3.06</b> | <b>1.77</b> |
| <b>Families</b> |             |             |             |             |             |             |             |             |
| <b>Abl</b>      | <b>0.43</b> | <b>0.3</b>  | <b>0.64</b> | <b>0.88</b> | <b>0.15</b> | <b>0.42</b> | <b>2.38</b> | <b>0.19</b> |
| <b>Fes</b>      | <b>2.02</b> | <b>2.00</b> | <b>1.37</b> | <b>2.00</b> | <b>1.90</b> | <b>2.00</b> | <b>2.07</b> | <b>1.62</b> |
| <b>Src</b>      | <b>0.47</b> | <b>0.85</b> | <b>0.73</b> | <b>0.59</b> | <b>0.56</b> | <b>0.15</b> | <b>0.51</b> | <b>0.20</b> |

**Table S9. Comparison of PSM performance.**

| <b>Kinase</b> | <b>Proteomic sample size</b> | <b>PSPL sample size</b> | <b>MCC</b> | <b>Sensitivity</b> | <b>Specificity</b> | <b>Accuracy</b> | <b>Precision</b> | <b>EER</b> | <b>AROC</b> | <b>Threshold</b> |
|---------------|------------------------------|-------------------------|------------|--------------------|--------------------|-----------------|------------------|------------|-------------|------------------|
| <b>Abl</b>    | 73                           | 20                      | 0.509      | 0.4795             | 0.9774             | 94.40           | 0.6034           | 0.3637     | 0.9247      | 56               |
| <b>Arg</b>    | 16                           | 37                      | 0.934      | 0.9375             | 0.9967             | 99.37           | 0.9375           | 0.0095     | 0.9988      | 82               |
| <b>Btk</b>    | 21                           | 34                      | 0.668      | 0.7123             | 0.9835             | 97.23           | 0.6522           | 0.0567     | 0.9811      | 92               |
| <b>Csk</b>    | 48                           | 27                      | 0.653      | 0.8542             | 0.9674             | 96.28           | 0.5256           | 0.0547     | 0.9785      | 23               |
| <b>Fyn</b>    | 55                           | 37                      | 0.672      | 0.7818             | 0.8841             | 83.97           | 0.8431           | 0.0579     | 0.9518      | 14               |
| <b>Hck</b>    | 31                           | 18                      | 0.579      | 0.9032             | 0.9243             | 92.22           | 0.4117           | 0.007      | 0.9522      | 14               |
| <b>Jak2</b>   | 52                           | 35                      | 0.602      | 0.7308             | 0.9596             | 94.55           | 0.5428           | 0.1194     | 0.9582      | 45               |
| <b>Lck</b>    | 38                           | 24                      | 0.602      | 0.7895             | 0.9630             | 95.55           | 0.4918           | 0.0663     | 0.9662      | 34               |
| <b>Lyn</b>    | 48                           | 47                      | 0.53       | 0.4583             | 0.9856             | 95.44           | 0.6666           | 0.2532     | 0.9299      | 89               |
| <b>Pyk2</b>   | 9                            | 13                      | 0.75       | 0.9200             | 0.9682             | 96.55           | 0.6389           | 0.0124     | 0.9862      | 30               |
| <b>Src</b>    | 167                          | 39                      | 0.374      | 0.4970             | 0.9435             | 91.79           | 0.3487           | 0.7462     | 0.8255      | 20               |
| <b>Syk</b>    | 66                           | 13                      | 0.67       | 0.6818             | 0.9848             | 96.83           | 0.6703           | 0.1995     | 0.9701      | 54               |
| <b>Yes</b>    | 59                           | 21                      | 0.822      | 0.9661             | 0.875              | 90.9677         | 0.8260           | -0.053     | 0.9601      | 11               |

“Proteomic sample size” was the number of curated endogenous substrates identified for the kinase, while the “PSPL sample size” is the number of amino acids that were identified as being significantly favorable at any position in the data from the Turk laboratory’s microarray experiments (Deng, Y.; Alicea-Velazquez, N. L.; Bannwarth, L.; Lehtonen, S. I.; Boggon, T. J.; Cheng, H. C.; Hytonen, V. P.; Turk, B. E. *J Proteome Res* 2014, 13, 4339.)

“MCC” - Matthews correlation coefficient is a measure of the quality of the binary classification ranging from -1 to +1. A coefficient of +1 represents a perfect prediction, 0 is a random prediction and -1 is the classification is predicting the opposite of the observation in the data.

“Sensitivity” - the true positive rate.

“Specificity” – the true negative rate.

“Accuracy” - the proportion of true results in the classification.

“Precision” – the positive prediction value or the rate of true positives compared to all positives results in the classification.

“EER” – Equal Error Rate, which is the rate that the acceptance and rejection errors are equal. The lower the EER the more accurate the prediction.

“AROC” – Area under the Receiver-Operator Curve representing the Whitney-Mann coefficient.

“Threshold” – the value used to delineate the binary classification for each kinase prediction model.

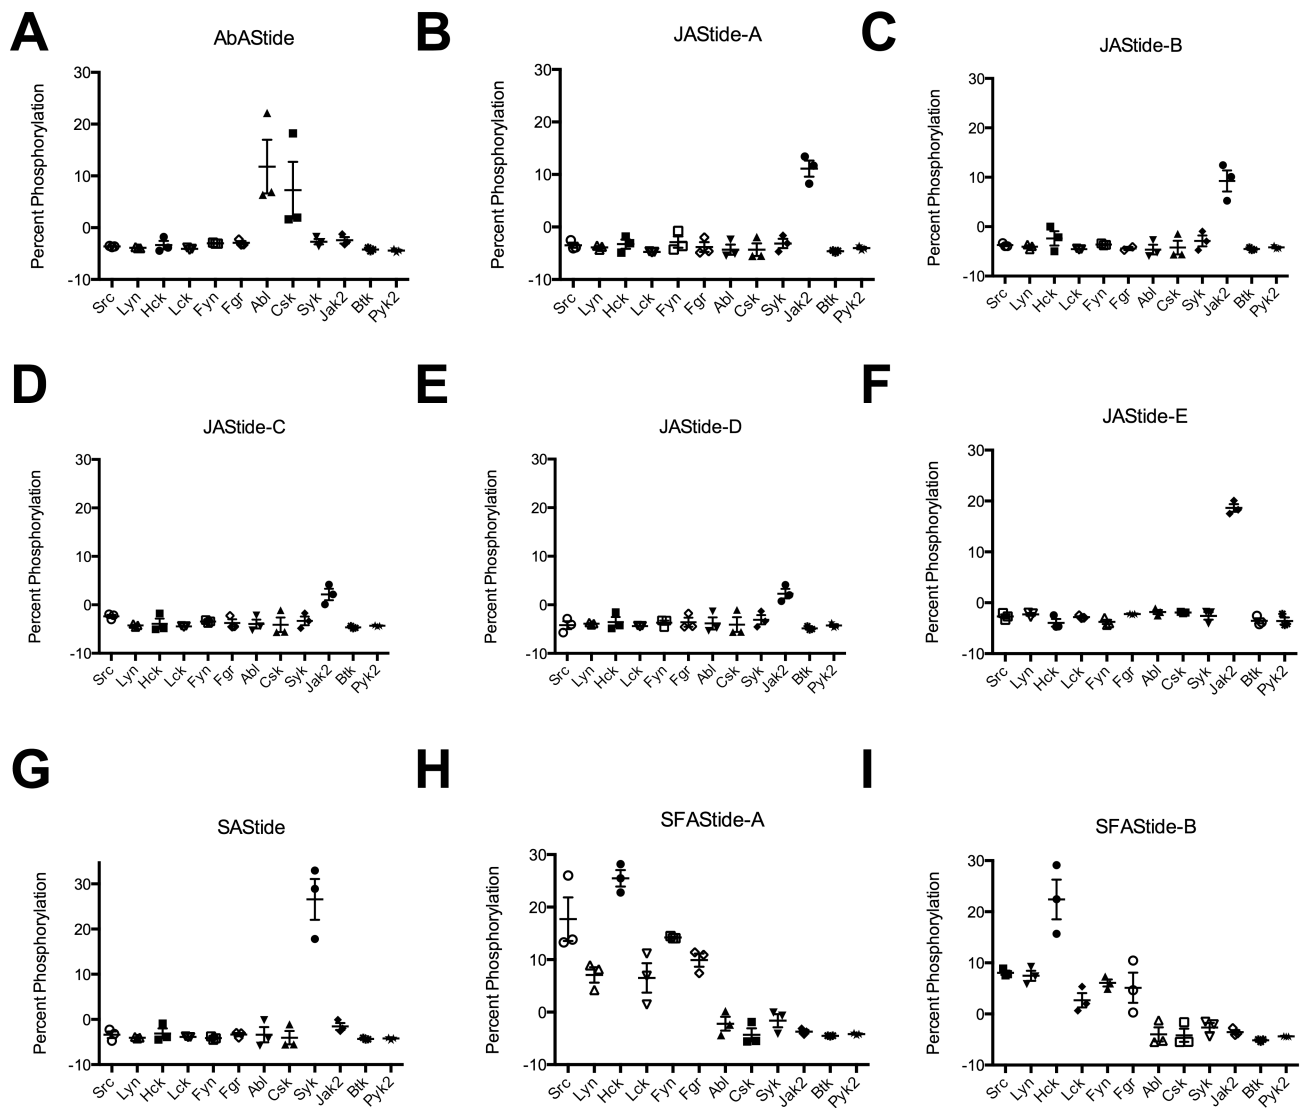

**Figure S1.** Percent phosphorylation of the various peptide biosensors by the collection of kinases used to generate the heat map in Figure 2B. A) AbASide B) JASide-A C) JASide-B D) JASide-C E) JASide-D F) JASide-E G) SASide H) SFASide-A I) SFASide-B.

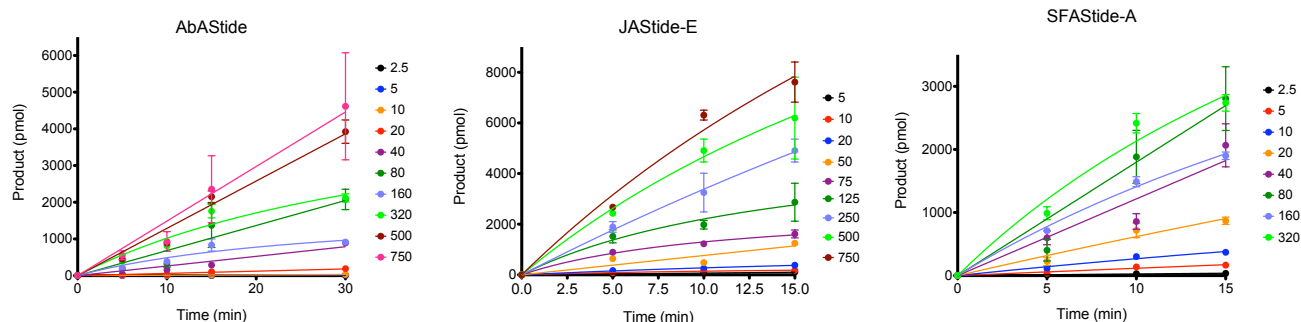

**Figure S2. Kinetic rate plots of AbAStide with Abl, JAStide-E with Jak2, and SFAStide-A with Lyn.**

**Table S10. AbAStide initial rate equations from Abl kinase reaction progress curves. Equations represent the average of three replicates.**

| AbAStide                        |                        |       |
|---------------------------------|------------------------|-------|
| Concentration ( $\mu\text{M}$ ) | Equation               | $R^2$ |
| 2.5                             | $y = 0.2621x + 0.3033$ | 0.83  |
| 5                               | $y = 0.3625x + 0.2056$ | 0.91  |
| 10                              | $y = 1.045x + 0.3476$  | 0.68  |
| 20                              | $y = 6.576x - 12.84$   | 0.90  |
| 40                              | $y = 30.78x - 93.78$   | 0.78  |
| 80                              | $y = 53.64x - 45.81$   | 0.79  |
| 160                             | $y = 73.78x - 116.8$   | 0.82  |
| 320                             | $y = 81.26x - 4.294$   | 0.97  |
| 500                             | $y = 88.55x + 1.871$   | 0.97  |
| 750                             | $y = 93.21x + 29.86$   | 0.71  |

**Table S11. JAStide-E initial rate equations from Jak2 kinase reaction progress curves. Equations represent the average of three replicates.**

| JAStide-E                       |                      |       |
|---------------------------------|----------------------|-------|
| Concentration ( $\mu\text{M}$ ) | Equation             | $R^2$ |
| 5                               | $y = 3.183x + 1.872$ | 0.69  |
| 10                              | $y = 16.33x + 6.170$ | 0.85  |
| 20                              | $y = 33.64x + 15.56$ | 0.79  |
| 50                              | $y = 127.5x + 27.34$ | 0.94  |
| 75                              | $y = 178.4x + 31.54$ | 0.96  |
| 125                             | $y = 304.0x + 90.35$ | 0.90  |
| 250                             | $y = 378.3x + 74.65$ | 0.95  |
| 500                             | $y = 486.0x + 38.00$ | 0.99  |
| 750                             | $y = 532.8x - 24.46$ | 0.99  |

**Table S12. SFAS tide-A initial rate equations from Lyn kinase reaction progress curves. Equations represent the average of three replicates.**

| <b>SFAS tide-A</b>                              |                       |                      |
|-------------------------------------------------|-----------------------|----------------------|
| <b>Concentration (<math>\mu\text{M}</math>)</b> | <b>Equation</b>       | <b>R<sup>2</sup></b> |
| 2.5                                             | $y = 2.567x - 0.1921$ | 0.70                 |
| 5                                               | $y = 11.99x - 4.547$  | 0.87                 |
| 10                                              | $y = 25.99x + 0.5626$ | 0.90                 |
| 20                                              | $y = 62.01x - 12.29$  | 0.88                 |
| 40                                              | $y = 129.1x - 87.81$  | 0.82                 |
| 80                                              | $y = 148.9x - 11.03$  | 0.99                 |
| 160                                             | $y = 188.2x - 179.5$  | 0.75                 |
| 320                                             | $y = 241.6x - 73.03$  | 0.97                 |

**Table S13. Kinetic constants for kinase specific peptide biosensors**

| <b>Sensor</b> | <b><math>K_m</math> (<math>\mu\text{M}</math>)</b> | <b><math>V_{\max}</math> (pmol/min)</b> | <b><math>k_{\text{cat}}</math> (<math>\text{min}^{-1}</math>)</b> | <b><math>k_{\text{cat}}/K_m</math></b> | <b>R<sup>2</sup></b> |
|---------------|----------------------------------------------------|-----------------------------------------|-------------------------------------------------------------------|----------------------------------------|----------------------|
| AbAS tide     | 99 $\pm$ 22                                        | 107 $\pm$ 7                             | 1430 $\pm$ 96                                                     | 14                                     | 0.92                 |
| JAS tide-E    | 186 $\pm$ 27                                       | 672 $\pm$ 37                            | 2690 $\pm$ 148                                                    | 14                                     | 0.96                 |
| SFAS tide-A   | 62 $\pm$ 10                                        | 270 $\pm$ 16                            | 3600 $\pm$ 148                                                    | 58                                     | 0.96                 |

**Table S14. Biosensor characterization of physical and photophysical properties**

| <b>Sensor</b> | <b>Steady-State S:N</b> | <b>Time-Resolved S:N</b> | <b><math>K_d</math> (<math>\mu\text{M}</math>)</b> | <b><math>\tau_{\text{H}_2\text{O}}^{-1}</math> (ms)</b> | <b><math>\tau_{\text{D}_2\text{O}}^{-1}</math> (ms)</b> | <b>q</b> | <b><math>\Delta q</math></b> |
|---------------|-------------------------|--------------------------|----------------------------------------------------|---------------------------------------------------------|---------------------------------------------------------|----------|------------------------------|
| SFAS tide-A   | 2.1:1                   | 10.6:1                   | 1.4 $\pm$ 0.17                                     | 1.35                                                    | 0.51                                                    | 4        | 2                            |
|               |                         |                          | 9.8 $\pm$ 0.54                                     | 1.83                                                    | 0.53                                                    | 6        |                              |
| SFAS tide-B   | 2.1:1                   | 6.2:1                    | 8.2 $\pm$ 1.0                                      | 1.73                                                    | 0.71                                                    | 5        | 2                            |
|               |                         |                          | 54 $\pm$ 10                                        | 2.13                                                    | 0.67                                                    | 7        |                              |
| JAS tide-B    | 1.1:1                   | 4.6:1                    | 1.6 $\pm$ 0.21                                     | 1.26                                                    | 0.81                                                    | 2        | 2                            |
|               |                         |                          | 15 $\pm$ 0.46                                      | 1.63                                                    | 0.71                                                    | 4        |                              |
| JAS tide-E    | 1.9:1                   | 6.8:1                    | 7.9 $\pm$ 6.2                                      | 1.61                                                    | 0.62                                                    | 4        | 2                            |
|               |                         |                          | 67 $\pm$ 8.7                                       | 2.10                                                    | 0.72                                                    | 6        |                              |
| AbAS tide     | 1.3:1                   | 7.3:1                    | 12 $\pm$ 2.6                                       | 1.65                                                    | 0.61                                                    | 4        | 2                            |
|               |                         |                          | 26 $\pm$ 3.7                                       | 2.21                                                    | 0.74                                                    | 6        |                              |

S:N – signal to noise,  $K_d$  – dissociation constant,  $\tau_{\text{H}_2\text{O}}^{-1}$  – luminescence lifetime in the presence of  $\text{H}_2\text{O}$ ,  $\tau_{\text{D}_2\text{O}}^{-1}$  – luminescence lifetime rate in the presence of  $\text{D}_2\text{O}$ , q – hydration number; the number of  $\text{H}_2\text{O}$  ligands in the inner coordination sphere at equilibrium,  $\Delta q$  – change in hydration number upon phosphorylation. The top row for each sensor represents the phosphorylated form while the bottom row represents the unphosphorylated form.

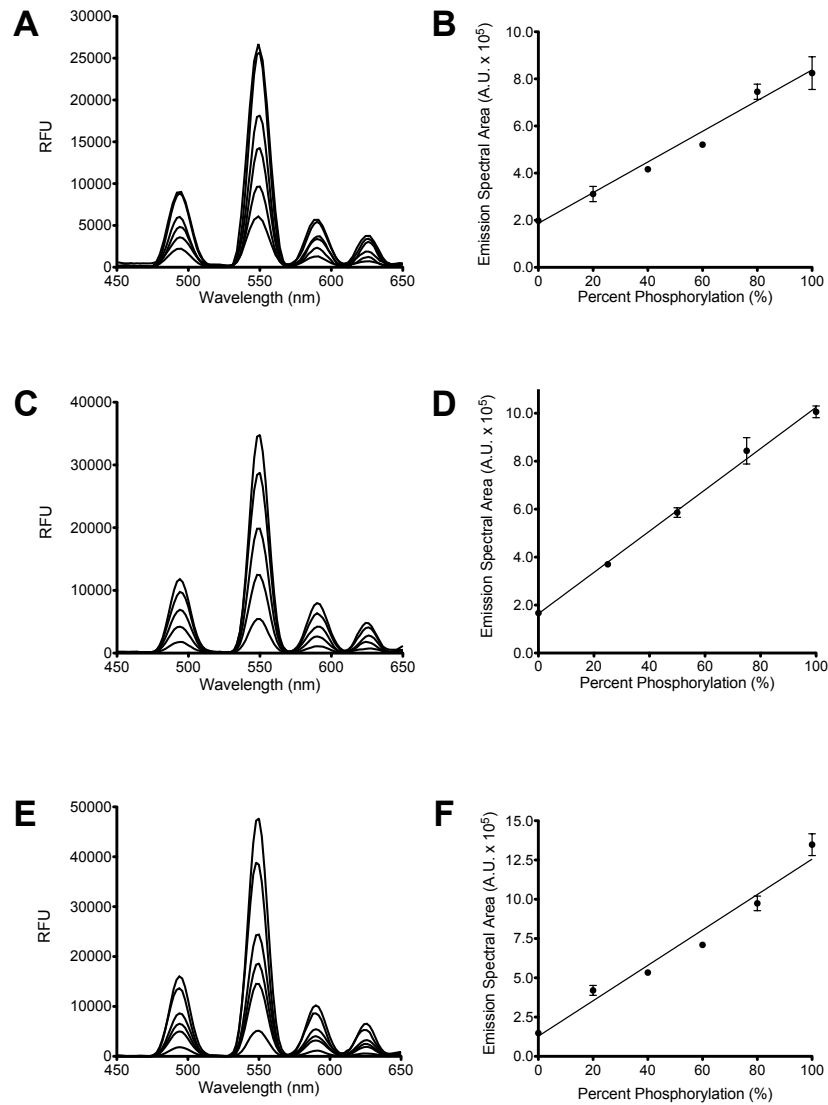

**Figure S3. Calibration Curves.** Synthetic phosphopeptide and unphosphorylated peptide were mixed in the proportions represented in the plots in (B-D); either 20%, 40%, 60%, 80% and 100% (A,B and E,F) or 25%, 50%, 75%, and 100% (C,D). (A) pAbASTide-Tb<sup>3+</sup> luminescence emission spectra in the presence of quenched *in vitro* kinase buffer. (B) pAbASTide-Tb<sup>3+</sup> luminescence emission spectral area calibration curve based on percent phosphorylation. (C) pJASTide-Tb<sup>3+</sup> luminescence emission spectra in the presence of quenched *in vitro* kinase buffer. (D) pJASTide-Tb<sup>3+</sup> luminescence emission spectral area calibration curve based on percent phosphorylation. (E) pSFASide-A-Tb<sup>3+</sup> luminescence emission spectral area calibration curve based on percent phosphorylation. (F) pSFASide-A-Tb<sup>3+</sup> luminescence emission spectral area calibration curve based on percent phosphorylation. Data indicate mean  $\pm$ SEM for triplicate wells.

**Table S15. Characterization of biosensor high-throughput screening parameters.**

| Sensor     | Limit of Detection | Limit of Quantification | Z' factor | Signal Window | Signal:Noise | R <sup>2</sup> |
|------------|--------------------|-------------------------|-----------|---------------|--------------|----------------|
| SFAStide-A | 7.9                | 21.8                    | 0.79      | 13.7          | 9.1:1        | 0.95           |
| JAStide-E  | 3.1                | 9.6                     | 0.90      | 30.8          | 6.0:1        | 0.98           |
| AbAStide   | 4.8                | 12.1                    | 0.65      | 5.86          | 4.2:1        | 0.95           |

**Table S16. Characterization of high-throughput screening parameters in inhibitor assay. 500 nM of the inhibitor was used as the negative signal while all other concentrations were used as the positive signal with respect to the equations 2 and 3 in the methods section.**

| Inhibitor   | Concentration (log nM) | Signal Window | Z' factor |
|-------------|------------------------|---------------|-----------|
| Dasatinib   | -2                     | 6.75          | 0.631     |
|             | -1                     | 6.38          | 0.614     |
|             | 0                      | 2.82          | 0.387     |
|             | 1                      | 1.13          | 0.397     |
|             | 2                      | -0.341        | -0.284    |
| Imatinib    | -2                     | 15.5          | 0.766     |
|             | -1                     | 9.72          | 0.695     |
|             | 0                      | 5.25          | 0.838     |
|             | 1                      | 2.96          | 0.359     |
|             | 2                      | -3.85         | -1.97     |
| Ruxolitinib | -2                     | 5.20          | 0.701     |
|             | -1                     | 4.78          | 0.647     |
|             | 0                      | 1.08          | 0.454     |
|             | 1                      | -12.2         | -0.518    |
|             | 2                      | -21.05        | -11.5     |



**Table S17. Percent inhibition of the top compounds in the high throughput screen and secondary screen.**

| Compound  | HTS   | Secondary Screen |
|-----------|-------|------------------|
| SB-250715 | 76.87 | 47.34            |
| GW829874X | 79.09 | 58.12            |
| GW442130X | 100.8 | 64.28            |
| GW809897X | 89.47 | 66.16            |
| GW406108X | 90.96 | 67.67            |
| GW305074X | 77.69 | 67.83            |
| GW589961A | 77.82 | 67.91            |
| GW280670X | 78.28 | 70.68            |
| GW768505A | 79.57 | 72.89            |
| GW827099X | 86.35 | 76.62            |
| GW513184X | 84.55 | 80.32            |
| GW806742X | 76.74 | 80.63            |
| GW643971X | 78.76 | 80.81            |
| GW612286X | 80.39 | 84.23            |
| GW711782X | 86.67 | 87.32            |
| GW410563A | 78.84 | 89.68            |
| GW693917A | 83.62 | 97.54            |

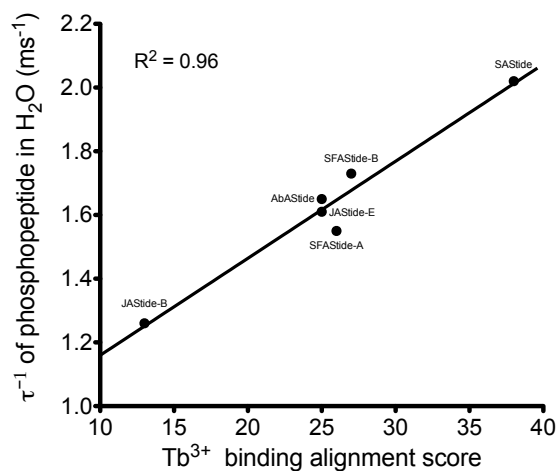

**Figure S4. Correlation between sequence alignment score and phosphopeptide luminescent lifetime**

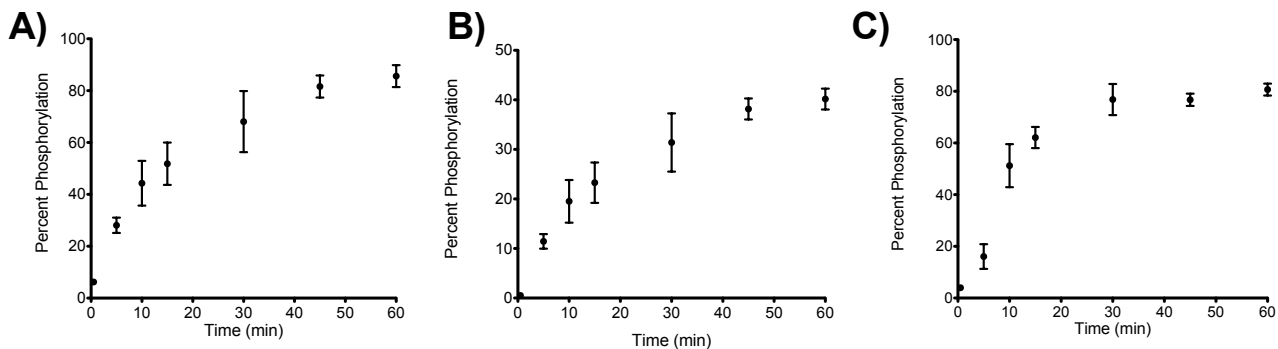

**Figure S5. ELISA-based chemifluorescent validation of biosensor phosphorylation from *in vitro* assays for A) AbASTide B) JASTide-E and C) SFASTide-A.**

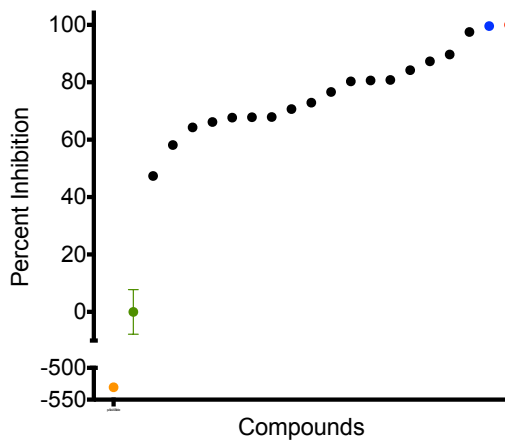

**Figure S6. Secondary inhibitor screen validation of high-throughput screening hits using ELISA-based chemifluorescence detection. • DMSO, • pABASTide, • PKIS compounds, • AbASTide, and • imatinib.**
